# Supplementary material for: Dual targeting of salt inducible kinases and CSF1R uncouples bone formation and bone resorption
Source: eLife journal article supplement (doi:10.7554/elife.67772), 2021-06-23
Supplement: supp [file elife-67772-supp-v1.zip]

Archive with 20 entries (20 files):
- elife_poa_e67772_Reporting_Standards_Document.docx
- elife_poa_e67772_Source_Data_1.xlsx
- elife_poa_e67772_Supplemental_file_1.xlsx
- elife_poa_e67772_Supplemental_file_2.xlsx
- elife_poa_e67772_Supplemental_file_3.xlsx
- elife_poa_e67772_Supplemental_file_4.xlsx
- elife_poa_e67772_Supplemental_file_5.xlsx
- elife_poa_e67772_Supplemental_file_6.xlsx
- elife_poa_e67772_Supplemental_file_7.xlsx
- elife_poa_e67772_Figure_1_figure_supplement_1.pdf
- elife_poa_e67772_Figure_2_figure_supplement_1.pdf
- elife_poa_e67772_Figure_2_figure_supplement_2.pdf
- elife_poa_e67772_Figure_3_figure_supplement_1.pdf
- elife_poa_e67772_Figure_3_figure_supplement_2.pdf
- elife_poa_e67772_Figure_3_figure_supplement_3.pdf
- elife_poa_e67772_Figure_3_figure_supplement_4.pdf
- elife_poa_e67772_Figure_6_figure_supplement_1.pdf
- elife_poa_e67772_Figure_8_figure_supplement_1.png
- elife_poa_e67772_Figure_8_figure_supplement_2.pdf
- elife_poa_e67772_Figure_8_figure_supplement_3.pdf
