# Supplementary material for: Dual targeting of salt inducible kinases and CSF1R uncouples bone formation and bone resorption
Source: eLife journal article supplement (doi:10.7554/elife.67772), 2021-06-23
Supplement: supp [file elife-67772-supp-v1.zip]

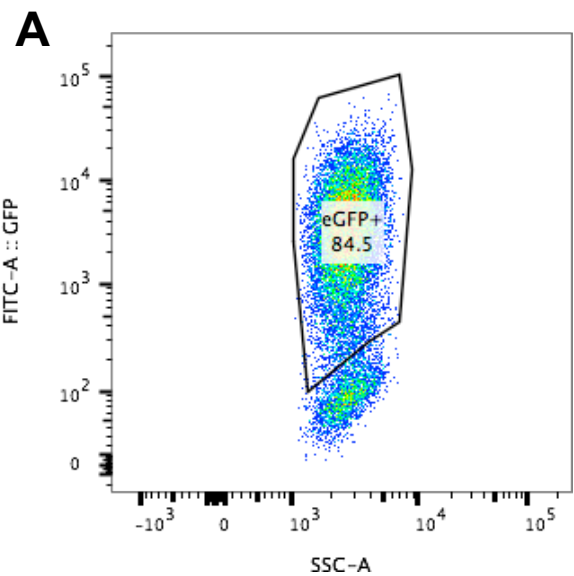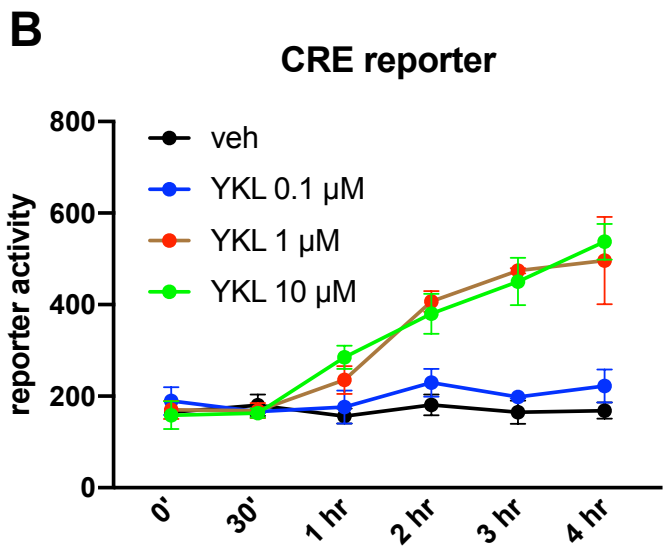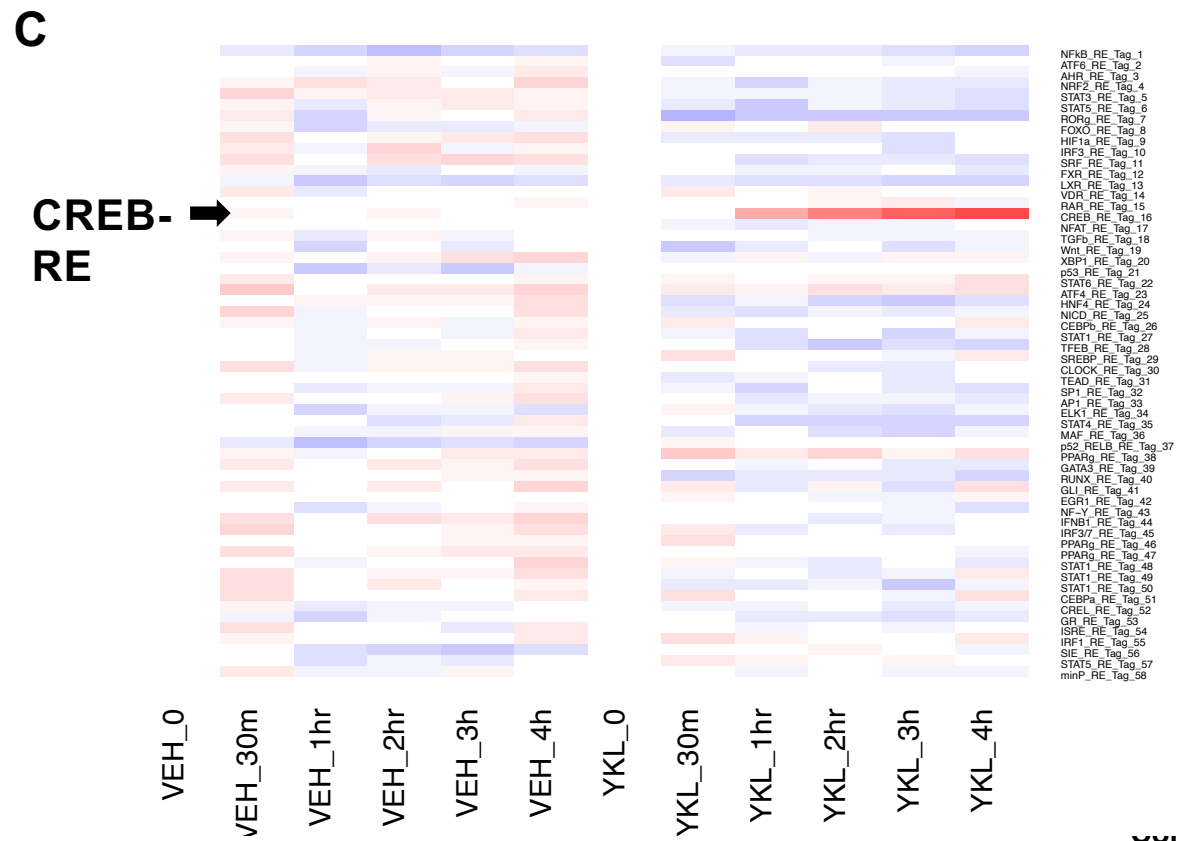

NFkB\_RE\_Tag\_1  
ATF6\_RE\_Tag\_2  
AHR\_RE\_Tag\_3  
NRF2\_RE\_Tag\_4  
STAT3\_RE\_Tag\_5  
STAT5\_RE\_Tag\_6  
RORg\_RE\_Tag\_7  
FOXO\_RE\_Tag\_8  
HIF1a\_RE\_Tag\_9  
IRF3\_RE\_Tag\_10  
SRF\_RE\_Tag\_11  
FXR\_RE\_Tag\_12  
LXR\_RE\_Tag\_13  
VDR\_RE\_Tag\_14  
RAR\_RE\_Tag\_15  
CREB\_RE\_Tag\_16  
NFAT\_RE\_Tag\_17  
TGFB\_RE\_Tag\_18  
Wnt\_RE\_Tag\_19  
XBP1\_RE\_Tag\_20  
p53\_RE\_Tag\_21  
STAT6\_RE\_Tag\_22  
ATF4\_RE\_Tag\_23  
HNF4\_RE\_Tag\_24  
NODD\_RE\_Tag\_25  
CEBPd\_RE\_Tag\_26  
STAT1\_RE\_Tag\_27  
TFEB\_RE\_Tag\_28  
SREBP\_RE\_Tag\_29  
CLOCK\_RE\_Tag\_30  
TEAD\_RE\_Tag\_31  
SP1\_RE\_Tag\_32  
AP1\_RE\_Tag\_33  
ELK1\_RE\_Tag\_34  
STAT4\_RE\_Tag\_35  
MAF\_RE\_Tag\_36  
p52\_RELB\_RE\_Tag\_37  
PPARg\_RE\_Tag\_38  
GATA3\_RE\_Tag\_39  
RUNX\_RE\_Tag\_40  
GLI\_RE\_Tag\_41  
EGR1\_RE\_Tag\_42  
NF-Y\_RE\_Tag\_43  
IFNB1\_RE\_Tag\_44  
IRF3/7\_RE\_Tag\_45  
PPARg\_RE\_Tag\_46  
PPARg\_RE\_Tag\_47  
STAT1\_RE\_Tag\_48  
STAT1\_RE\_Tag\_49  
STAT1\_RE\_Tag\_50  
CEBPd\_RE\_Tag\_51  
CREL\_RE\_Tag\_52  
GR\_RE\_Tag\_53  
ISRE\_RE\_Tag\_54  
IRF1\_RE\_Tag\_55  
SIE\_RE\_Tag\_56  
STAT5\_RE\_Tag\_57  
minP\_RE\_Tag\_58

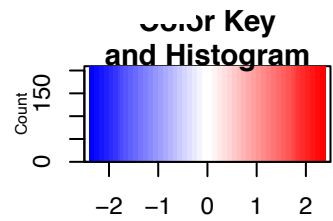

**Figure 6-figure supplement 1**
