# Supplementary material for: Dual targeting of salt inducible kinases and CSF1R uncouples bone formation and bone resorption
Source: eLife journal article supplement (doi:10.7554/elife.67772), 2021-06-23
Supplement: supp [file elife-67772-supp-v1.zip › elife_poa_e67772_Source_Data_1.xlsx]

## Sheet: Figure 1
Figure 1C: BV/TV							Figure 1D: tBMD							Figure 1E: L5 BV/TV							Figure 1F: Ct.Th
VEH	PTH	YKL	VEH	PTH	YKL		VEH	PTH	YKL	VEH	PTH	YKL		VEH	PTH	YKL	VEH	PTH	YKL		VEH	PTH	YKL	VEH	PTH	YKL
9.58	7.08	8.45	7.27	7.78	9.94		117.5	100.9	107	90.4	98.4	116.3		26.81	29.63	23.53	17.74	23.98	23.63		0.183	0.199	0.188	0.187	0.199	0.167
5.99	5.65	7	4.77	6.94	9.41		85.6	84.9	90.3	59.6	94.6	108.6		20.85	26.9	21.58	17.25	24.19	23.41		0.184	0.187	0.168	0.172	0.198	0.177
6.47	7.3	7.68	7.62	8.88	9.54		91.3	97.8	98.5	85.6	108.5	107.6		21.31	27.68	23.28	22.12	23.43	20		0.19	0.203	0.179	0.186	0.197	0.184
6.31	7.13	8.31	4.43	6.22	9.03		89.9	98.9	106.3	46.7	82.4	106.9		23.04	27.26	25.17	17.39	17.35	20.79		0.187	0.196	0.171	0.173	0.188	0.184
8.38	8.1	6.02	7.12	8.7	9.19		103.3	108.5	77.3	86.6	109.8	107.6		23.17		18.25	17.23	22.07	22.47		0.196	0.21	0.163	0.187	0.203	0.171
4.5	8.34	11.43	6.38	6.86	7.03		74.6	109.9	136.8	66	99.8	85.9		24.12		22.9	20.19		21.9		0.18	0.207	0.208	0.175	0.201	0.175
5.91	7.37	7.87	6.31	7.44	10.62		86.7	105.7	103.5	80	93.3	119.2		23.16		23.5	19.13				0.189	0.202	0.183	0.177	0.19	0.19
4.83		7.73		6.05	9.2		72		103.2		87.2	101.1									0.187	0.202	0.178	0.184	0.2	0.179

## Sheet: Figure 2
Figure 2A: P1NP							Figure 2B: CTX							Figure 2C: Ob./BS
VEH	PTH	YKL	VEH	PTH	YKL		VEH	PTH	YKL	VEH	PTH	YKL		VEH	PTH	YKL	VEH	PTH	YKL
30.37	32.49	28.63	31.82	80.52	48.86		15.069	31.788	15.814	16.878	23.828	25.615		11.3	21.45	17.81	11.8	25.68	16.99
18.69	49.58	35.27	22.54	57.67	56.46		13.054	31.996	30.06	20.64	28.608	15.348		6.19	20.22	17.93	11.53	23.93	17.5
29.96	28.42	31.14	20.08	66.25	30.19		27.3	22.336	27.736	17.429	26.734	22.372		9.48	32.61	21.44	14.1	27.86	23.25
27.93	41.47	32.37	26.17	69.37	39.43		17.894	23.792	18.858	21.5	34.472	19.8		14.09	26.08	17.72	9.35	25.65	19.8
29.61	47.89	30.78	33.49	54.95	54.03		18.828	23.504	18.786	11.054	31.232	18.328		9.64	21.1	18.31	18.32	22.66	19.29
26.99	40.66	46.31	29.22	65.92	31.96		23.156	21.876	25.24	17.226	27.897	15.447		11.06	22.26	7.62	11.87	25.85	15.81
23.36	70.59	46.22	30.68	74.33	52.17		13.16	26.014	17.56	17.358	27.48	20.998		8.5	25.59	19.13	14.32	37.57	15.01
29.47	48.65	43.13	26.24	77.3	46.65		13.064	18.432	20.984	11.95		14.412		8.17	18.97	22.65	16.55	27.37	20.48
Figure 2D: ES/BS							Figure 2F: MAR							Figure 2G: MS/BS
VEH	PTH	YKL	VEH	PTH	YKL		VEH	PTH	YKL	VEH	PTH	YKL		VEH	PTH	YKL	VEH	PTH	YKL
3.31	5.3	2.87	5.31	5.04	1.78		0.1273	0.3016	0.4404	0.1095	0.2046	0.3434		7.76	6.91	6.39	3.94	9.25	5.19
2.22	4.96	3.63	3.13	4.45	2.17		0.1054	0.3881	0.4663	0.1228	0.2233	0.347		5.93	9.17	7.52	4.23	7.78	5.21
3.57	7.14	1.99	6.07	6.65	3.18		0.1335	0.097	0.1748	0.0982	0.2571	0.1281		6.95	9.23	12.82	3.12	7.84	8.81
2.96	4.75	3.19	4.36	5.95	3.43		0.3764	0.2062	0.4717	0.3319	0.3999	0.1918		4.96	6.91	6.69	4.77	11.62	7.72
5.77	8.25	2.92	2.86	5.1	3.31		0.1677	0.1923	0.4166	0.1792	0.2341	0.3577		6.22	7.59	7.97	3.91	5.21	8.57
5.01	3.8	1.92	4.92	4.37	3.34		0.0943	0.3416	0.1825	0.1449	0.4122	0.2046		5.6	3.31	4.94	2.48	7.18	9.74
2.55	4.85	2.06	2.11	3.99	1.5		0.1428	0.2038	0.2332	0.074	0.225	0.3866		3.48	7.03	10.7	6.08	4.99	6.18
4.63	4.51	3.12	4.78	2.49	2.18		0.2917	0.2074		0.1784	0.271	0.2077		4.69	5.07		2.08	3.94	6.56
Figure 2H: BFR/BS
VEH	PTH	YKL	VEH	PTH	YKL
0.0099	0.0208	0.0281	0.0043	0.0189	0.0178
0.0063	0.0356	0.0351	0.0052	0.0174	0.0181
0.0093	0.009	0.0224	0.0031	0.0202	0.0113
0.0187	0.0143	0.0316	0.0158	0.0465	0.0148
0.0104	0.0146	0.0332	0.007	0.0122	0.0307
0.0053	0.0113	0.009	0.0036	0.0296	0.0199
0.005	0.0144	0.0249	0.0043	0.0112	0.0239
0.0137	0.0105		0.0037	0.0107	0.0136

## Sheet: Figure 3
Figure 3A: cortical bone gDNA abundance
	control				DKO
SIK1	1.03406	0.884208	0.910379	1.17139	1.11881	1.64695
SIK2	1.25427	0.768687	0.856525	1.12052	0.318832	0.396904
SIK3	1.2259	0.681868	0.772287	1.31995	0.161156	0.179186
Figure 3C: BV/TV			Tb.N			Tb.Sp			ConnD.			Ct.Porosity
control	DKO		control	DKO		control	DKO		control	DKO		control	DKO
33.57	64.49		6.19	13.204		0.149	0.05		325	1017		0.8	36.17
17.71	53.04		5.628	12.328		0.172	0.061		271	1239		0.39	9.51
23.26	49.56		6.033	13.058		0.156	0.058		298	1396		0.51	12.86

## Sheet: Figure 4
Figure 4B: P1NP			Figure 4C: CTX			Figure 4E: N.Ob/T.Ar			Figure 4F: N.Oc/T.Ar
Control	DKO		Control	DKO		control	DKO		control	DKO
5.26946	70.7574		84.9112	178.565		62.5	440.226		15.625	94.9961
9.02977	38.1928		53.2171	214.672		38.81	500		25.0387	116.66
11.5725	51.7163		57.7832	212.759		59.375	368.75		16.5	87.5
16.5742	45.2016		53.67	191.671
9.10356	47.5358		37.685	153.637
	51.1606			126.465		Figure 4G: BFR/TV			Figure 4H: Fb.V/TV
	41.8433			134.387		control	DKO		control	DKO
	44.7577			107.65		0.0004	0.0087		0	0.7983
						0.0004	0.0161		0	1.2338
						0.0006	0.012		0	1.0708

## Sheet: Figure 5
Figure 5B
Sik1
	vehicle			4-OHT
control	1.27056	0.313188	1.41625	1.54218	1.62596	1.64633
Sik2/3 DKO	1.84003	1.78185	1.7921	1.22422	1.07505	1.05244
Sik2
	vehicle			4-OHT
control	0.892356	1.02945	1.0782	1.4955	1.47489	1.1402
Sik2/3 DKO	0.996855	1.14999	0.88467	0.082309	0.064796	0.070507
Sik3
	vehicle			4-OHT
control	1.03222	0.949967	1.01781	1.10509	1.20725	1.30143
Sik2/3 DKO	1.12815	0.997431	1.05862	0.150554	0.157	0
Figure 5E: sTRAP A405
	vehicle					4-OHT
control	1.7597	0.9031	1.2191	1.3521	0.9304	1.4081	0.7323	1.4721	2.5499	1.246
DKO	0.5716	0.7597	0.8549	0.8204	2.9224	2.058	1.0627	1.8891	1.7473	2.2661
Figure 5F: TRAP+ cells
	vehicle													4-OHT
control	85	91	89	73	58	69	42	76	19	38	37	35	29	46	68	49	55	109	61	44	45	59	56	37	60	67
DKO	109	65	52	49	79	11	19	32	66	76	57	69	80	175	127	97	126	82	24	38	27	72	59	95	61	91
Figure 5H: resorbed surface
	vehicle										4-OHT
control	37.7231	63.8327	14.195	45.9384	58.2442	45.8852	45.5375	26.4793	67.6138	75.6088	63.3805	37.0306	75.0067	57.7372	50.5159	73.5371	44.9876	16.7715	54.6607	49.6872
DKO	28.2131	43.8675	46.2218	38.3612	42.2142	48.3533	52.6674	56.0426	47.9209	85.5155	64.309	28.1205	27.4225	13.6438	32.5	39.7374	40.7333	46.8192	26.1403	17.2544

## Sheet: Figure 6
Figure 6A: gDNA abundance
Sik1
	vehicle			4-OHT
control	0.953215	1.04644	1.00035	1.20609	1.31798	1.21362
Sik1/2/3 TKO	0.929041	1.00248	1.06848	0.188846	0.222131	0.20863
Sik2
	vehicle			4-OHT
control	0.950419	1.03611	1.01347	1.10174	1.18963	1.11249
Sik1/2/3 TKO	0.986148	0.991915	1.02194	0.157036	0.194393	0.193868
Sik3
	vehicle			4-OHT
control	1.03334	0.992844	0.973819	1.03066	0.937776	0.820671
Sik1/2/3 TKO	1.01324	1.008	0.978751	0.296225	0.328608	0.271576
Figure 6C: sTRAP A405
	vehicle					4-OHT
control	0.7089	2.8424	0.3969	1.4224	0.9154	2.0508	3.0414	2.0589	2.1508	2.9815
TKO	1.6789	1.0684	4	1.4216	2.0242	2.1478	2.1864	2.8069	2.5588	2.0954
Figure 6D: TRAP+ cells
	vehicle													4-OHT
control	49	36	29	34	44	71	37	8	21	27	11	37	7	43	38	23	18	33	72	52	48	48	23	25	65	38
TKO	46	52	38	33	32	58	45	94	42	16	30	13	22	32	33	40	35	52	113	61	38	50	48	55	48	46
Figure 6H: resorbed surface
	vehicle					4-OHT
control	42.5952	20.3808	28.2727	73.9637	56.4292	76.555	54.7658	45.8819	54.3469	28.6647
TKO	52.9707	40.0157	23.1693	35.4956	34.5276	34.9688	47.5207	43.6669	41.773	45.8074

## Sheet: Figure 8
Figure 8A: CSFR1 Kinase Assay
concentration YKL-05-099	% activity
2e-05	1.42
5e-06	0.58
1.25e-06	1.4
3.13e-07	0.36
7.81e-08	1.35
1.95e-08	4.1
4.88e-09	20.16
1.22e-09	51.49
3.05e-10	82.88
7.63e-11	98.9
Figure 8C: secreted TRAP					Figure 8C: TRAP+ MNCs
concentration YKL-05-099	A405 mean	SD	N		concentration YKL-05-099	#/well	SD	N
1.95e-08	1.10027	0.0556081	3		1.95e-08	46.5	2.5	3
3.9e-08	0.8885	0.031735	3		3.9e-08	23.6667	3.21455	3
7.8e-08	0.497233	0.0479097	3		7.8e-08	10.1667	0.763763	3
1.56e-07	0.226967	0.00594082	3		1.56e-07	0.666667	1.1547	3
3.13e-07	0.181367	0.00346458	3		3.13e-07	0	0	3
6.25e-07	0.169167	0.00080829	3		6.25e-07	0	0	3
1.25e-06	0.169533	0.00061101	3		1.25e-06	0	0	3
2.5e-06	0.148733	0.0139747	3		2.5e-06	0	0	3
5e-06	0.142733	0.00100167	3		5e-06	0	0	3
1e-05	0.1655	0.00034641	3		1e-05	0	0	3
2e-05	0.1665	0.00236432	3		2e-05	0	0	3
Figure 8F: Ets2
	VEH			M-CSF (1 hr)			M-CSF (2 hr)
VEH	1	0.26435		7.20356	0.810834		11.237	1.73444
YKL-05-099 (15 µM)	1	0.191077		1.57317	0.0746831		1.0834	0.0649642
Figure 8G: Egr1
	VEH			M-CSF (1 hr)			M-CSF (2 hr)
VEH	1	0.210917		10.1496	0.590643		1.70491	0.155913
YKL-05-099 (15 µM)	1	0.226777		2.1451	0.295788		0.973373	0.0383561
Figure 8H: sTRAP
[PLX 5622]	Control						DKO						TKO						Control 2
0	1.14403	0.789134	1.06684	0.95926	0.727976	1.31276	1.65202	0.748714	0.599263	0.860173	0.957327	1.1825	1.06769	1.03734	0.894971	1.08725	1.07641	0.836339	1.06687	1.05202	0.881111	1.24973	0.770805	0.979465
0.0012207	0.470693	1.29492	0.970617	0.641088	0.82785	0.283313			0.653993	0.50781	0.586304	1.03736	1.16242	1.26409	1.03523	0.411786	0.495681	0.55366	1.30545	1.34817	1.46538	0.523423	0.258058	0.455211
0.00488281	1.27634	1.36557	0.0964482	0.265193	0.190946	0.196943	0.191823	0.211166	0.376737	1.0232	0.318181	0.793349	0.745503	0.75791	0.888104	0.207708	0.230293	0.393769	1.40614	0.842205	1.06138	0.262696	0.412201	0.257445
0.0195312	0.564569	0.326471	0.348305	0.157338	0.122092	0.128606	0.182765	0.280173	0.444362	0.201181	0.234356	0.265398	0.21868	0.229878	0.228551	0.106053	0.133249	0.152888	0.260188	0.192715	0.226182	0.25167	0.18919	0.123604
0.078125	0.104162	0.117741	0.0992	0.0817107	0.0805459	0.0792948	0.135788	0.152061	0.137323	0.109713	0.112912	0.122095	0.0813468	0.0806445	0.0851703	0.0791125	0.0788137	0.0837662	0.102409	0.104418	0.0975582	0.0781874	0.0754747	0.0778812
0.3125	0.0673965	0.0656371	0.0680731	0.0654894	0.0636343	0.0622106	0.108845	0.112069	0.117749	0.087439	0.105744	0.0991094	0.256096	0.0661699	0.0677695	0.0619494	0.0638707	0.0685243	0.0843773	0.0773214	0.0791343	0.0645364	0.0605986	0.0623924
1.25	0.0806592	0.0764639	0.0763736	0.0722195	0.0709684	0.0698898	0.124044	0.127421	0.133332	0.0975099	0.102012	0.104678	0.0699543	0.0681987	0.0729195	0.0719826	0.0713422	0.07527	0.0862883	0.0842793	0.0856023	0.0721495	0.069568	0.072937
5	0.0775465	0.0767797	0.0775014	0.0797693	0.0789496	0.0758434	0.12911	0.135097	0.138858	0.108529	0.113209	0.115993	0.0880184	0.0777964	0.076587	0.0748431	0.0827842	0.0855594	0.0960882	0.0888853	0.105692	0.0752122	0.075606	0.0746434
Figure 8I: sTRAP
[YKL-05-099]	Control						DKO						Control 2						TKO
0	1.19807	0.622916	1.17901	1.02872	0.894812	1.07647	1.13523	1.22843	0.636346	1.03518	0.993273	0.971548	1.00554	1.06419	0.930276	0.947563	1.14034	0.912096	1.23618	1.03527	0.728554	1.1459	1.08519	0.768901
0.0012207	0.945092	1.20985	0.823075	1.04494	0.852074	0.829472	1.31343	1.53027	1.5017	1.13605	1.14757	1.13159	0.600017	1.29401	0.375097	0.918901	0.424054	0.494001	1.01456	0.89507	1.10559	0.90159	0.771047	0.717985
0.00488281	1.10008	0.724583	0.821152	0.796856	0.565933	0.507703	0.692717	0.419192	0.510602	1.04742	0.85901	1.12768	0.61908	0.440546	0.903726	0.332072	0.323223	0.408506	1.07268	0.963537	0.991639	0.49782	0.42309	0.290468
0.0195312	0.778405	0.828799	0.189754	0.16678	0.189709	0.157818	0.502979	0.600602	0.491833	0.269352	0.283141	0.332839	0.510127	0.731561	0.808672	0.193236	0.174303	0.139436	0.229252	0.233566	0.362921	0.211109	0.200309	0.173408
0.078125	0.100038	0.0943128	0.0880448	0.0754626	0.0720522	0.0717257	0.121261	0.121261	0.110563	0.0757316	0.0835957	0.0865761	0.088901	0.0962592	0.087524	0.0729437	0.0669503	0.063742	0.11099	0.11968	0.104396	0.120279	0.111022	0.108137
0.3125	0.0705779	0.0672767	0.0609669	0.0596445	0.0573588	0.0631273	0.0941644	0.0939722	0.0911537	0.0607936	0.0572745	0.0605063	0.070613	0.0775409	0.06915	0.0547519	0.0536589	0.0509795	0.087387	0.0908381	0.0820255	0.0945864	0.0906286	0.0864024
1.25	0.0773892	0.0748402	0.0747566	0.0639255	0.0656307	0.0667554	0.109602	0.106912	0.101659	0.0624454	0.0612604	0.0608295	0.0784446	0.0770676	0.0752173	0.0614152	0.0602165	0.0571845	0.0919474	0.100883	0.0921939	0.106997	0.102234	0.105185
5	0.075843	0.0741716	0.0717897	0.0655218	0.0660297	0.0676261	0.110819	0.108898	0.10531	0.0719971	0.0688371	0.0776348	0.0842107	0.0828337	0.0809404	0.0623671	0.0603928	0.0588768	0.104088	0.112038	0.0987264	0.122157	0.113034	0.104179
Figure 8E:

## Sheet: Figure 1-figure supplement 1
Bending Rigidity							CaMean
VEH	PTH	YKL	VEH	PTH	YKL		VEH	PTH	YKL	VEH	PTH	YKL
954.4	1115.9	993.4	804.1	980.8	851.1		27.1211	27.0223	27.3858	26.6773	26.842	26.607
917.7	1121.1	803.5	666.4	987.9	998.1		26.8872	27.3645	27.2786	27.4832	27.0327	27.1544
1044	1180	957.7	926.5	1076.7	966.4		27.14	27.0385	27.7211	27.301	26.9884	27.2108
982.9	991.8	964.1	903	896.3	802.9		27.001	26.231	27.2804	27.2459	27.445	27.1304
1068.1	1119.1	927.7	812.8	983.9	724.7		27.4157	28.0088	27.3561	26.6693	27.1244	27.4776
910.3	1073.2	1234.3	861.5	1086.3	869.2		27.4964	27.0213	26.7085	27.2045	27.592	26.9012
1072.8	1036.4	775.2	1081.9	1068.1	788.5		26.9185	27.5414	27.242	27.8706	27.1857	27.3687
1112.1	1178.9		870.6	1034.3	1039		27.4027	27.0342	28.4274	26.7927	27.3001	27.3555
CaWidth							CaLow
VEH	PTH	YKL	VEH	PTH	YKL		VEH	PTH	YKL	VEH	PTH	YKL
2.7728	3.1194	2.7728	3.1194	3.2927	3.2927		6.05621	5.80913	5.74542	6.54492	6.22379	7.3432
2.7728	2.9461	2.7728	3.2927	3.1194	3.1194		5.47829	5.82309	5.22131	5.85287	6.37499	5.63751
2.9461	2.9461	3.1194	3.466	3.1194	2.9461		4.73164	5.26493	4.39805	5.29679	5.76678	4.3381
2.5995	2.9461	2.5995	3.1194	3.2927	3.1194		5.43747	7.28634	4.16107	6.09246	4.55163	5.49086
2.5995	3.2927	3.2927	3.2927	2.9461	2.9461		4.68636	4.26616	4.62966	7.2519	6.19541	4.45919
2.7728	2.9461	2.9461	3.466	3.2927	2.7728		6.00552	5.93387	6.30252	5.82389	4.92644	5.06916
2.7728	2.9461	3.1194	2.9461	2.7728	3.1194		5.79968	5.31914	5.57671	4.52847	4.84581	4.17232
2.7728	2.9461	2.9461	2.9461	3.6393	2.9461		4.08617	5.72015	3.70358	5.47162	7.87817	4.86669

## Sheet: Figure 2-figure supplement 1
AV/TV							AV/MV
VEH	PTH	YKL	VEH	PTH	YKL		VEH	PTH	YKL	VEH	PTH	YKL
17.25	34.45	14.06	27.09	43.03	11.16		18.44	36.02	14.5	27.52	44.64	11.62
15.58	14.06	18.04	40.67	39.68	25.05		16.14	14.52	18.85	41.77	40.59	26.33
19.71	15.81	14.25	53.01	28.07	27.64		20.44	16.26	14.68	54.8	29.46	28.78
16.02	23.16	16.3	48.4	31.14	26.96		16.58	24.24	17.23	52.34	31.74	30.16
34.32	20.95	18.89	19.43	34.55	32.75		37.74	21.94	19.13	20.97	36.41	34.4
23.27	18.08	14.31	31.96	38.37	38.97		23.55	18.87	14.6	33.63	39.3	40.21
15.81	33.89	14.62	29.36	45.28	25.55		16.79	34.38	15.16	30.94	46.97	27.32
20	17.24	13.27	38.58	21.78	20.28		20.51	17.5	13.95	40.38	23.09	20.9

## Sheet: Figure 2-figure supplement 2
WBC				Hgb				Plt				Absolute Monocyte Count
VEH	PTH	YKL		VEH	PTH	YKL		VEH	PTH	YKL		VEH	PTH	YKL
5.88	6.91	1.85		15.5	16.2	8.3		704	1024	65		0.26	0.39	0.14
8.7	14.82	11.98		14.9	15.8	16.7		1050	1109	1353		0.72	0.26	0.32
10.88	12.59	2.88		16.3	16.8	17.9		1282	1110	410		0.58	0.19	0.24
8.47	12.06	6.12		15.9	16.3	17.5		1333	1191	1602		0.31	0.16	0.4
8.01	7.96	9.92		16.7	15.3	16.7		1076	1026	1606		0.16	0.35	0.15
5.17	11.36	9.52		16.3	15.9	15.4		1115	954	1426		0.34	0.3	0.05
5.56	7.07	7.62		15.9	16.1	17.1		662	577	955		0.26	0.38	0.3
3.93	4.26	5.29		16.1	8.1	16.9		1180	127	1244		0.6	0.55	0.06
14.12	6.6	10.45		16.6	15.4	17.9		965	924	1238		0.09	0.25	0.82
13.54	9.83	11.54		15.7	15.7	15.8		1216	1220	1834		0.38	0.27	0.24
6.05	8.37	2.23		16.1	16.2	16		1028	1110	258		0.12	0.43	0.64
8.9	5.85	8.6		15.7	16.3	16.7		1174	1317	1691		0.36	0.35	0.29
5.65	7.06	10.98		13.4	14.7	16.1		269	993	1677		0.36	0.64	0.19
2.63	12.35	8.25		6.9	16.3			88	1118	1414		0.01	0.07	0.46
11.09	9.06	3.11		15.9	16.5			1110	981	1234		0.35	0.29	0.2
9.79	9.06	2.59		15	16.1			1396	824	68		0.19	0.12	0.16
Glucose				BUN				Cholesterol				Triglycerides				ALT
VEH	PTH	YKL		VEH	PTH	YKL		VEH	PTH	YKL		VEH	PTH	YKL		VEH	PTH	YKL
135	138			29	25.4	41.7		78	95	79		91	103	139		14	27	24
137	143	291		37.4	28.2	33.1		101	80	88		111	115	130		25	25	37
164	162	211		26.5	22.9	35.8		100	95	80		102	106	136		33	24	27
180	184	177		24.5	33.5	37.1		88	90	88		112	98	137		21	21	32
145	142	234		22.3	19.7	34.1		108	101	94		116	136	123		26	27	31
143	151	179			24.2	29.4		71	95	102		91	110	108		26	36	24
195	171	171		36.6	36.2	29.3		101	101	89		95	84	110		44	30	30
196	175	240		29.2	18.5	31.2		113	80	65		93	131	132		25	26	43
184	191	314		21.4	28	40.7		130	110	118		134	187	120		27	35	34
198	248	223		20.4	28.5	34.1		122	90	156		107	175	112		24	30	27
244	311	303		20.5	22.9	25.6		101	80	121		108	84	138		48	30	27
327	364	201		26.2	25.5	24.7		61	87	125		90	119	137		20	32	32
205	214	208		21.3	26.9	27.2		108	110	127		114	165			31	27
143	194	206		26.8	32.3	31.7		114	102	119		153	208			28	31
238	197	271		25.3	25.5	29.8		114	93			98	122			20
114	260	317		29.4	29.2				106				119
AlkP
VEH	PTH	YKL
82	102	101
82	74	93
103	104	132
95	116	87
87	135	130
106	110
69	172
91	146
124	166
84	123
	152
	142
	167

[truncated: 7 more sheets: Figure 3-figure supplement 1, Figure 3-figure supplement 3, Figure 3-figure supplement 4, Figure 6-figure supplement 1, Figure 8-figure supplement 1, Figure 8-figure supplement 2, Figure 8-figure supplement 3]
