# Supplementary material for: Dual targeting of salt inducible kinases and CSF1R uncouples bone formation and bone resorption
Source: eLife journal article supplement (doi:10.7554/elife.67772), 2021-06-23
Supplement: supp [file elife-67772-supp-v1.zip › elife_poa_e67772_Supplemental_file_1.xlsx]

## Sheet: Sheet1
Femoral metaphysis (trabecular bone architecture)
	BV/TV (%)	ConnD. (1/mm3)	BMD (mgHA/cm3)	SMI	Tb.N (1/mm)	Tb.Th (mm)	Tb.Sp (mm)
SHAM + VEH	6.50 ± 1.71	45.9 ± 14.1	90.1 ± 14.8	2.914 ± 0.287	3.000 ± 0.244	0.050 ± 0.004	0.334 ± 0.027
SHAM + PTH	7.28 ± 0.87	57.3 ± 4.7	100.9 ± 8.5	2.741 ± 0.149	2.923 ± 0.125	0.053 ± 0.003	0.340 ± 0.019
SHAM + YKL	8.06 ± 1.57	62.5 ± 9.0	102.9 ± 16.9	2.292 ± 0.168	3.083 ± 0.244	0.047 ± 0.003	0.322 ± 0.028
OVX + VEH	6.27 ± 1.24	42.2 ± 12.1	73.6 ± 16.4	2.951 ± 0.168	2.977 ± 0.182	0.050 ± 0.005	0.336 ± 0.021
OVX + PTH	7.36 ± 1.05	46.4 ± 9.5	96.7 ± 9.5	2.992 ± 0.165	2.933 ± 0.172	0.056 ± 0.003	0.342 ± 0.022
OVX + YKL	9.25 ± 1.03	69.5 ± 12.8	106.6 ± 10.1	2.216 ± 0.092	3.221 ± 0.223	0.048 ± 0.003	0.310 ± 0.022
Femoral midshaft (cortical bone properties)
	Tt.Ar [mm2]	Ct.Ar [mm2]	Ma.Ar [mm2]	Ct. Th (mm)	Ct. TMD (mgHA/cm3)	Ct.Ar/Tt.Ar (%)	Ct. Porosity (%)	pMOI[mm4]	Imax[mm4]	Imin[mm4]	Bone length (mm)
SHAM + VEH	1.688 ± 0.091	0.784 ± 0.037	0.904 ± 0.057	0.187 ± 0.005	1263.9 ± 19.9	46.46 ± 0.88	0.23 ± 0.04	0.344 ± 0.036	0.233 ± 0.026	0.111 ± 0.012	15.29 ± 0.23
SHAM + PTH	1.746 ± 0.046	0.854 ± 0.030	0.891 ± 0.032	0.201 ± 0.007	1273.9 ± 5.0	48.93 ± 1.16	0.27 ± 0.12	0.381 ± 0.022	0.256 ± 0.018	0.124 ± 0.005	15.11 ± 0.18
SHAM + YKL	1.672 ± 0.077	0.753 ± 0.061	0.919 ± 0.069	0.180 ± 0.014	1257.6 ± 8.6	45.03 ± 3.13	0.24 ± 0.04	0.329 ± 0.035	0.221 ± 0.027	0.108 ± 0.011	15.09 ± 0.20
OVX + VEH	1.758 ± 0.060	0.770 ± 0.030	0.988 ± 0.046	0.179 ± 0.006	1255.9 ± 9.8	43.81 ± 1.28	0.24 ± 0.04	0.352 ± 0.022	0.232 ± 0.015	0.120 ± 0.009	15.80 ± 0.30
OVX + PTH	1.776 ± 0.082	0.846 ± 0.038	0.930 ± 0.057	0.197 ± 0.005	1270.5 ± 7.8	47.66 ± 1.42	0.23 ± 0.03	0.386 ± 0.032	0.258 ± 0.019	0.127 ± 0.014	15.52 ± 0.30
OVX + YKL	1.738 ± 0.127	0.763 ± 0.045	0.975 ± 0.089	0.178 ± 0.007	1261.4 ± 14.1	43.94 ± 1.36	0.24 ± 0.03	0.346 ± 0.047	0.228 ± 0.033	0.117 ± 0.014	15.82 ± 0.22
L5 Vertebral Body (trabecular bone architecture)
	BV/TV (%)	ConnD. (1/mm3)	BMD (mgHA/cm3)	SMI	Tb.N (1/mm)	Tb.Th (mm)	Tb.Sp (mm)
SHAM + VEH	23.21 ± 1.96	128.2 ± 20.4	222.5 ± 17.4	0.416 ± 0.153	3.808 ± 0.357	0.055 ± 0.002	0.262 ± 0.026
SHAM + PTH	27.87 ± 1.22	209.4 ± 19.7	247.6 ± 6.1	-0.133 ± 0.224	3.854 ± 0.270	0.059 ± 0.002	0.268 ± 0.029
SHAM + YKL	22.60 ± 2.19	193.6 ± 26.9	205.0 ± 18.9	0.258 ± 0.208	3.753 ± 0.376	0.050 ± 0.001	0.271 ± 0.033
OVX + VEH	18.72 ± 1.87	122.3 ± 20.8	179.0 ± 16.4	0.676 ± 0.199	3.488 ± 0.244	0.049 ± 0.003	0.288 ± 0.022
OVX + PTH	22.20 ± 2.84	206.1 ± 46.8	201.1 ± 23.8	0.526 ± 0.284	3.412 ± 0.358	0.054 ± 0.002	0.305 ± 0.035
OVX + YKL	22.03 ± 1.44	186.9 ± 38.3	200.3 ± 15.4	0.247 ± 0.187	3.814 ± 0.344	0.049 ± 0.002	0.264 ± 0.027
Supplemental File 1: MicroCT parameters for all skeletal sites
For each parameter, the mean ± SD are listed. Bold values indicate p < 0.05 versus vehicle-treated mice within each surgical group for drug-treated mice.
For OVX + VEH parameters, bold values indicate p < 0.05 versus SHAM + VEH mice.
YKL-05-099 treatment tends to increase trabecular bone mass, while PTH treatment has greater effects on cortical parameters at this treatment dose.
