# Supplementary material for: Dual targeting of salt inducible kinases and CSF1R uncouples bone formation and bone resorption
Source: eLife journal article supplement (doi:10.7554/elife.67772), 2021-06-23
Supplement: supp [file elife-67772-supp-v1.zip › elife_poa_e67772_Supplemental_file_2.xlsx]

## Sheet: Sheet1
Femur mechanical testing
	Bending Rigidity (N*mm^2)	Apparent Elastic Modulus (MPa)	Mmax (Nmm)	Work to Fracture (mJ)	Work to Max (mJ)
SHAM + VEH	1007.8 ± 76.7	8974.5 ± 640.3	36.79 ± 2.28	9.69 ± 3.3	3.65 ± 0.82
SHAM + PTH	1102.0 ± 65.6	8989.8 ± 834.7	39.46 ± 1.29	8.21 ± 5.1	3.64 ± 0.52
SHAM + YKL	950.8 ± 150.3	9041.5 ± 1448.2	33.03 ± 3.24	8.63 ± 2.1	3.45 ± 0.62
OVX + VEH	865.9 ± 118.4	7185.0 ± 989.0	33.51 ± 2.75	10.6 ± 3.3	4.39 ± 0.86
OVX + PTH	1014.3 ± 64.4	8281 ± 1196.1	37.44 ± 3.2	9.03 ± 3.3	4.63 ± 0.63
OVX + YKL	880 ± 110.9	7769.4 ± 1397.2	31.27 ± 3.34	5.92 ± 1.72	3.59 ± 0.72
Supplemental File 2: Biomechanical testing results
For each parameter, the mean ± SD are listed for n=8 mice/group. Bold values indicate p < 0.05 versus vehicle-treated mice within each surgical group for drug-treated mice.
For OVX + VEH parameters, bold values indicate p < 0.05 versus SHAM + VEH mice.
OVX surgery reduces long bone strength. In OVX mice, PTH treatment improves strength as assessed by increased yield load and increased work to load. Consistent with a lack of effects on cortical bone mass, YKL-05-099 treatment does not improve bone biomechanical properties.
