# Supplementary material for: Dual targeting of salt inducible kinases and CSF1R uncouples bone formation and bone resorption
Source: eLife journal article supplement (doi:10.7554/elife.67772), 2021-06-23
Supplement: supp [file elife-67772-supp-v1.zip › elife_poa_e67772_Supplemental_file_3.xlsx]

## Sheet: Sheet1
Proximal tibia, static and dynamic histomorphometry (trabecular surfaces)
	Ob.S/BS	N.Ob/B.Pm	ES/BS	Oc.S/BS	N.Oc/B.Pm	OS/BS	MS/BS%	MAR(µm/d)	BFR/BS µm³/µm²/d
SHAM + VEH	9.80 ± 2.38	18.37 ± 3.5	3.75 ± 1.3	4.10 ± 1.2	2.84 ± 0.9	2.20 ± 1.3	5.70 ± 1.3	0.18 ± 0.1	0.0099 ± 0.005
SHAM + PTH	23.54 ± 4.4	39.42 ± 8.0	5.44 ± 1.5	5.23 ± 1.6	3.65 ± 1.3	4.99 ± 3.1	6.90 ± 1.9	0.24 ± 0.1	0.0163 ± 0.009
SHAM + YKL	17.83 ± 4.5	29.54 ± 8.6	2.71 ± 0.6	3.19 ± 0.6	1.96 ± 0.4	2.27 ± 0.9	8.14 ± 2.7	0.34 ± 0.1	0.0263 ± 0.009
OVX + VEH	13.48 ± 2.9	25.59 ± 7.5	4.19 ± 1.4	4.36 ± 1.0	2.87 ± 0.8	2.91 ± 1.2	3.83 ± 1.3	0.15 ± 0.1	0.0059 ± 0.004
OVX + PTH	27.07 ± 4.6	49.91 ± 11.8	4.75 ± 1.3	4.67 ± 1.1	3.29 ± 1.0	6.82 ± 2.3	7.22 ± 2.5	0.28 ± 0.1	0.021 ± 0.012
OVX + YKL	18.5 ± 2.7	34.81 ± 7.6	2.61 ± 0.8	3.13 ± 0.89	1.96 ± 0.7	3.23 ± 1.5	7.25 ± 1.7	0.27 ± 0.1	0.019 ± 0.006
Supplemental File 3: Histomorphometry measurements
For each parameter, the mean ± SD are listed. Bold values indicate p<0.05 versus vehicle-treated mice within each surgical group for drug-treated mice. For OVX + VEH parameters, bold values indicate p<0.05 versus SHAM + VEH mice.
Both PTH and YKL-05-099 increase osteoblast numbers and bone formation rate. PTH tends to increase osteoclast parameters, while YKL-05-099 reduces osteoclast numbers and activity.
Ob.S/BS	osteoblast surface/bone surface
N.Ob/B.Pm	number of osteoblasts/bone perimeter
ES/BS	eroded surface/bone surface
Oc.S/BS	osteoclast surface/bone surface
N.Oc/B.Pm	number of osteoclasts/bone perimeter
OS/BS	osteoid surface/bone surface
MS/BS%	mineralizing surface/bone surface
MAR(µm/d)	matrix apposition rate
BFR/BS µm³/µm²/d	bone formation rate/bone surface
