# Supplementary material for: Dual targeting of salt inducible kinases and CSF1R uncouples bone formation and bone resorption
Source: eLife journal article supplement (doi:10.7554/elife.67772), 2021-06-23
Supplement: supp [file elife-67772-supp-v1.zip › elife_poa_e67772_Supplemental_file_4.xlsx]

## Sheet: Sheet1
Metaphyseal Bone
	CaMean	CaPeak	CaWidth	CaLow	CaHigh
SHAM + VEH	23.9 ± 0.6	25.4 ± 0.5	4.25 ± 0.5	30.4 ± 6.1	4.23 ± 1.4
SHAM + PTH	23.6 ± 0.5	25.0 ± 0.5	4.48 ± 0.4	39.2 ± 7.5	3.02 ± 1.7
SHAM + YKL	23.6 ± 0.5	25.1 ± 0.5	4.11 ± 0.4	35.3 ± 7.1	2.65 ± 1.5
OVX + VEH	23.4 ± 0.8	24.8 ± 0.6	4.18 ± 0.3	41.2 ± 11.0	3.43 ± 1.9
OVX + PTH	23.3 ± 0.7	24.7 ± 0.7	4.31 ± 0.3	42.2 ± 10.8	2.14 ± 1.3
OVX + YKL	23.8 ± 0.5	24.9 ± 0.4	3.92 ± 0.4	34.1 ± 7.3	2.76 ± 1.0
Cortical bone
	CaMean	CaPeak	CaWidth	CaLow	CaHigh
SHAM + VEH	27.2 ± 0.2	27.7 ± 0.3	2.75 ± 0.1	5.29 ± 0.7	33.47 ± 8.2
SHAM + PTH	27.2 ± 0.5	27.8 ± 0.5	3.01 ± 0.1	5.68 ± 0.8	34.75 ± 14.0
SHAM + YKL	27.4 ± 0.5	28.0 ± 0.5	2.95 ± 0.2	4.96 ± 0.9	40.97 ± 13.7
OVX + VEH	27.2 ± 0.4	27.8 ± 0.4	3.21 ± 0.2	5.86 ± 0.8	35.34 ± 12.2
OVX + PTH	27.2 ± 0.2	27.9 ± 0.3	3.18 ± 0.3	5.84 ± 1.1	35.92 ± 6.9
OVX + YKL	27.2 ± 0.3	27.8 ± 0.3	3.03 ± 0.2	5.17 ± 1.0	33.42 ± 7.4
Supplemental File 4: QBEI BMDD results
For each parameter, the mean ± SD are listed for n=8 mice/group. Bold values indicate p<0.05 versus vehicle-treated mice within each surgical group for drug-treated mice. For OVX + VEH parameters, bold values indicate p<0.05 versus SHAM + VEH mice.
Minimal effects on BMDD were noted in response to OVX surgery and drug treatments.
