# Supplementary material for: Dual targeting of salt inducible kinases and CSF1R uncouples bone formation and bone resorption
Source: eLife journal article supplement (doi:10.7554/elife.67772), 2021-06-23
Supplement: supp [file elife-67772-supp-v1.zip › elife_poa_e67772_Supplemental_file_5.xlsx]

## Sheet: Sheet1
Femoral Metaphysis (Trabecular Bone Architecture)
	WT	Sik2/3 DKO
BV/TV (%)	24.85 ± 8.0	55.70 ± 7.8
ConnD. (1/mm3)	297.93 ± 27.4	1217.6 ± 190
BMD (mgHA/cm3)	280.9 ± 63	474.4 ± 39
SMI	1.31 ± 0.65	-1.65 ± 2.05
Tb.N (1/mm)	5.95 ± 0.3	12.86 ± 0.5
Tb.Th (mm)	0.053 ± 0.001	0.059 ± 0.005
Tb.Sp (mm)	0.16 ± 0.01	0.057 ± 0.006
Femoral midshaft (Cortical Bone Properties)
	WT	Sik2/3 DKO
Tt.Ar [mm2]	1.67 ± 0.11	1.69 ± 0.21
Ct.Ar [mm2]	0.48 ± 0.02	0.53 ± 0.08
Ma.Ar [mm2]	1.19 ± 0.13	1.16 ± 0.21
Ct. Th (mm)	0.186 ± 0.006	0.131 ± 0.033
Ct. TMD (mgHA/cm3)	1096 ± 30	1016 ± 37
Ct.Ar/Tt.Ar (%)	47.6 ± 1.6	52.5 ± 8.4
Ct. Porosity (%)	0.57 ± 0.2	19.5 ± 14.5
pMOI[mm4]	0.33 ± 0.04	0.33 ± 0.12
Imax[mm4]	0.206 ± 0.03	0.201 ± 0.08
Imin[mm4]	0.124 ± 0.01	0.133 ± 0.04
Supplemental File 5: femur micro-CT results related to Figure 3
For each parameter, the mean ± SD are listed for n=3 female mice/group. Bold values indicate p<0.05 versus control mice.
