# Supplementary material for: Dual targeting of salt inducible kinases and CSF1R uncouples bone formation and bone resorption
Source: eLife journal article supplement (doi:10.7554/elife.67772), 2021-06-23
Supplement: supp [file elife-67772-supp-v1.zip › elife_poa_e67772_Supplemental_file_6.xlsx]

## Sheet: Sheet1
Static and dynamic histomorphometry results
	WT	Sik2/3 DKO
BV/TV (%)	10.45 ± 2.7	50.96 ± 3.6
OV/BV (%)	0.007 ± 0.01	0.033 ± 0.03
OS/BS (%)	0.382 ± 0.44	0.431 ± 0.30
Ob.S/BS (%)	6.44 ± 1.4	10.96 ± 1.2
O.th (µm)	0.45 ± 0.2	1.10 ± 0.7
ES/BS (%)	4.59 ± 2.7	4.27 ± 0.8
Oc.S/BS (%)	4.94 ± 2.1	5.62 ± 0.8
Tb.Sp (µm)	325.8 ± 60	36.1 ± 2.3
Tb.N (mm)	2.81 ± 0.5	13.62 ± 1.4
Tb.Th (µm)	34.81 ± 6.6	37.8 ± 6.1
OB/B.Pm	9.63 ± 2.5	15.98 ± 1.1
N.Ob/T.Ar	53.56 ± 12.9	436.3 ± 65.7
Oc/B.Pm	3.50 ± 1.2	3.65 ± 0.2
N.Oc/T.Ar	19.1 ± 5.2	99.7 ± 15.1
N.Ot/T.Ar	74.5 ± 19.4	261.7 ± 43.8
N.Ot.B.Ar	712.5 ± 79	516.5 ± 102
MS/BS (%)	1.16 ± 0.2	1.8 ± 0.7
MAR (µm/d)	0.045 ± 0.03	0.295 ± 0.1
BFR/BS (µm/day)	0.0017 ± 0.0012	0.0055 ± 0.003
BFR/TV (%/d)	0.00047 ± 0.0001	0.0122 ± 0.003
MLT/day	5.61 ± 0.4	1.66 ± 0.8
FB.V/TV (%)	0 ± 0	1.03 ± 0.2
Supplemental File 6. Histomorphometry results related to Figure 4.
For each parameter, the mean ± SD are listed for n=3 female mice/group. Bold values indicate p<0.05 versus control mice.
Due to overt differences in trabecular bone content comparing wild type and inducible Sik2/3 mutant mice, cellular parameters normalized to tissue area are more informative than those normalized to bone surfaces.
