# Supplementary material for: Dual targeting of salt inducible kinases and CSF1R uncouples bone formation and bone resorption
Source: eLife journal article supplement (doi:10.7554/elife.67772), 2021-06-23
Supplement: supp [file elife-67772-supp-v1.zip › elife_poa_e67772_Supplemental_file_7.xlsx]

## Sheet: Sheet1
Supplemental File 7: PCR primer sequences
SIK1mF (SY33)	CACAACCACCACATTGTCCA
SIK1mR	TCCATGTTGCTGTCCAGGAG
SIK2mF (SY45)	CCAGTGTTTGCAGAGTGCAT
SIK2mR	CCAGGCACCACTCTCATCTA
SIK3mF (SY37)	GAGCTCTTCGAAGGGAAGGA
SIK3mR	CATAGAGGACAACTCCAAGGC
SIK1wF (SY4)	GACCAGTCTTCTGGGTTGGA
SIK1wR	GAGTGCTTGCTTCCCTGATG
SIK2wF (SY8)	ACTGTGTGGAGGGAGAATGG
SIK2wR	CAGAGCAGCTTAGGCAACTG
SIK3wF (SY11)	GCTTTCCTCCCTTTCCCTCT
SIK3wR	GAGAGTGAGACTCGGAGGTG
Ets2-F	AATGCAGGCACCAAACTACC
Ets2-R	CGAGACTTGGGCAACATCTG
Egr1-F	TCGCTCACTCCACTATCCAC
Egr1-R	TGGGTTTGATGAGCTGGGAT
Actin-F	CCTCTATGCCAACACAGTGC
Actin-R	ACATCTGCTGGAAGGTGGAC
