# Supplementary figures and images for: Dual targeting of salt inducible kinases and CSF1R uncouples bone formation and bone resorption
Source: eLife journal article supplement (doi:10.7554/elife.67772), 2021-06-23

**A**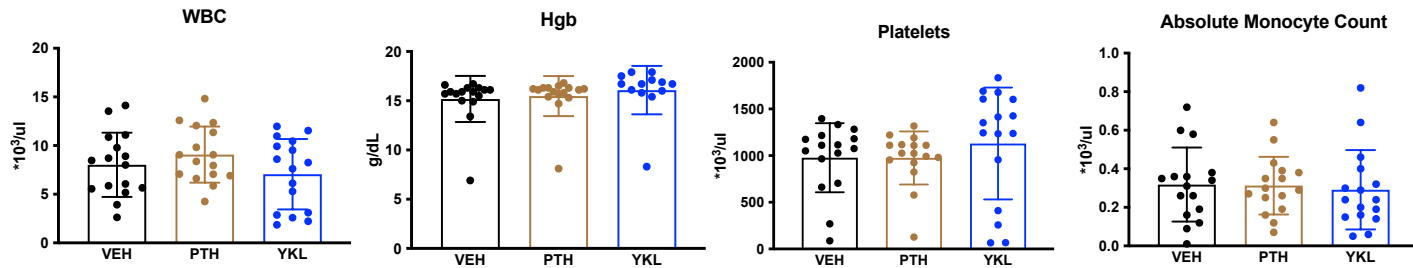**B**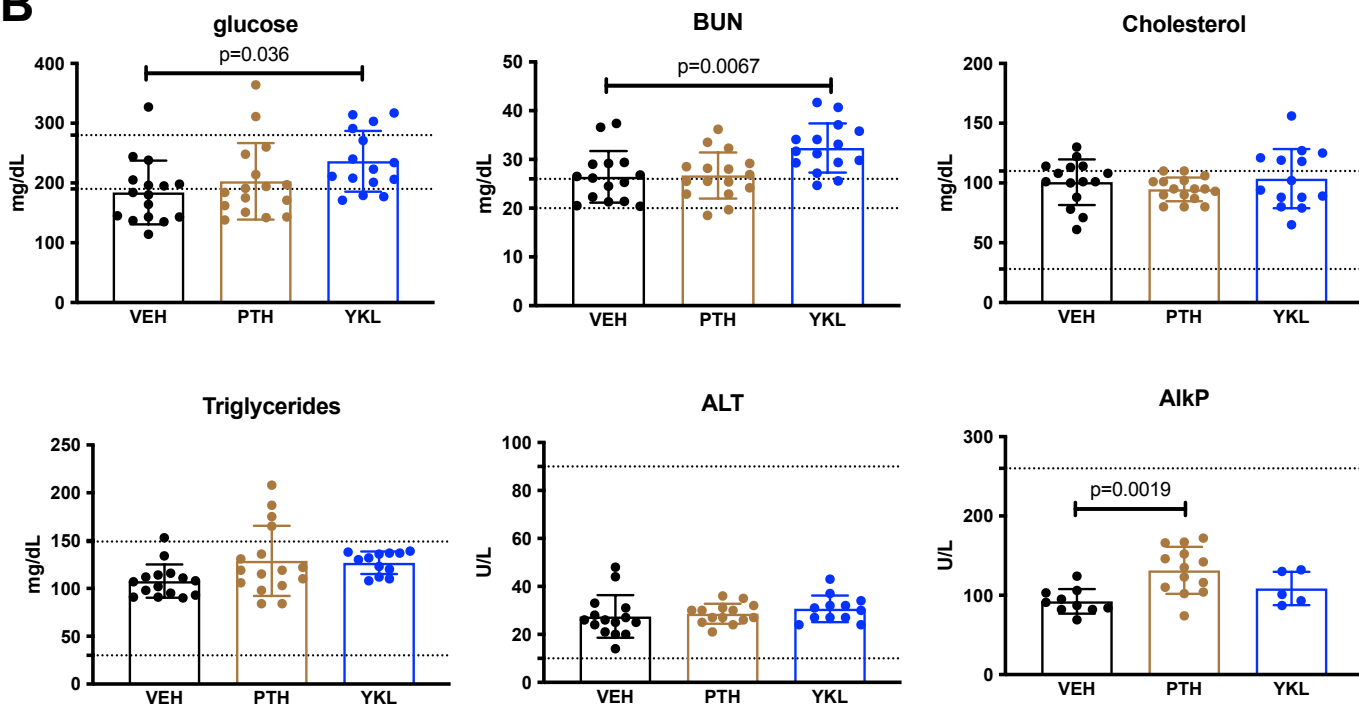

**Figure 2-figure supplement 2**

Supplement: supp [file elife-67772-supp-v1.zip]

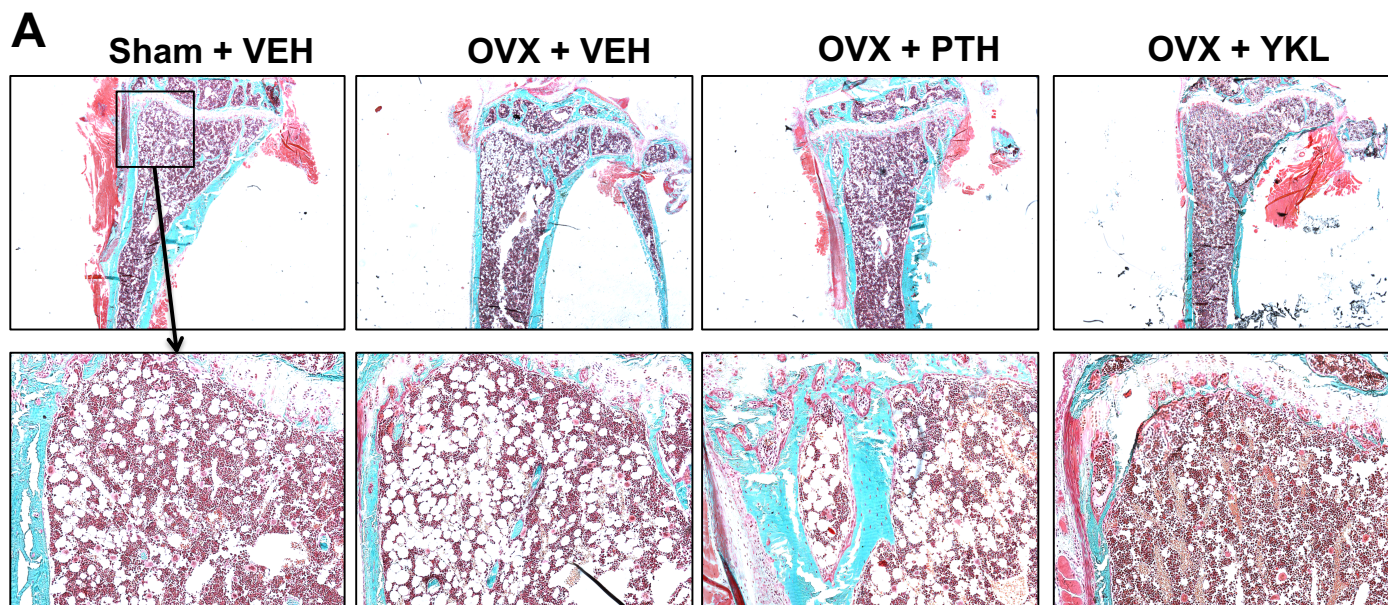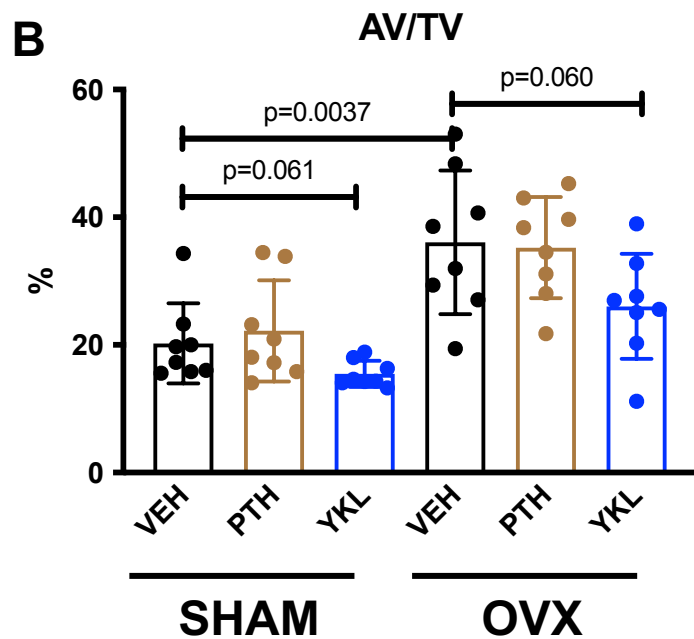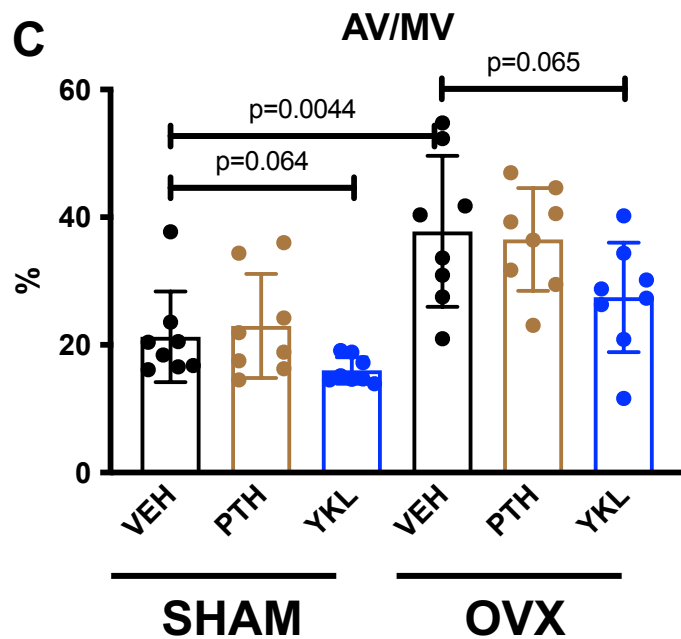

Figure 2-figure supplement 1

Supplement: supp [file elife-67772-supp-v1.zip]

**A**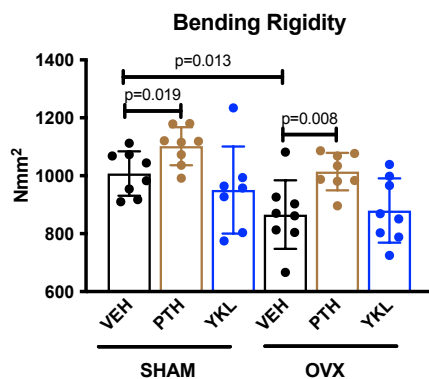**B**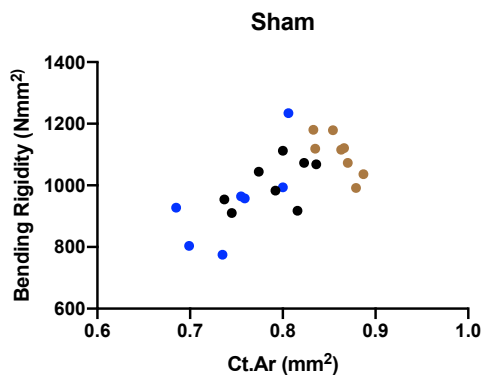**C**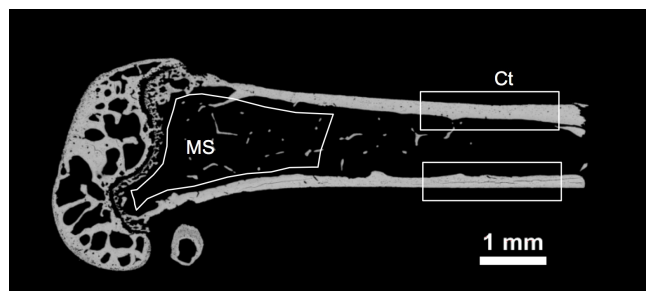**D**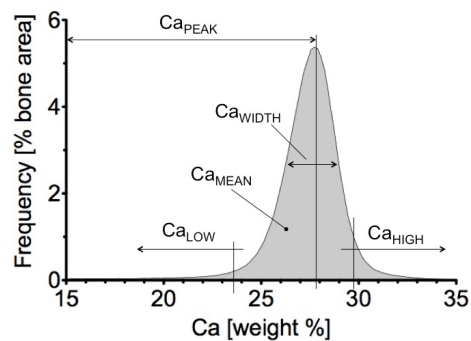**E**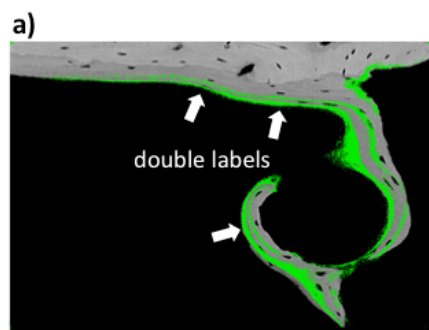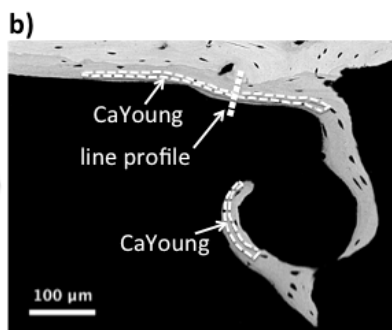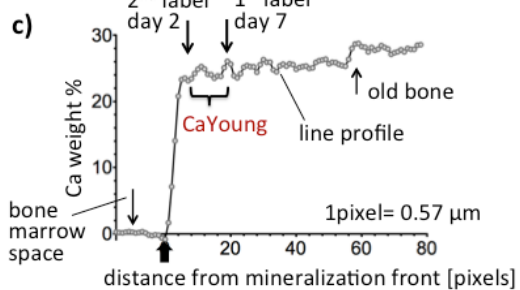**F**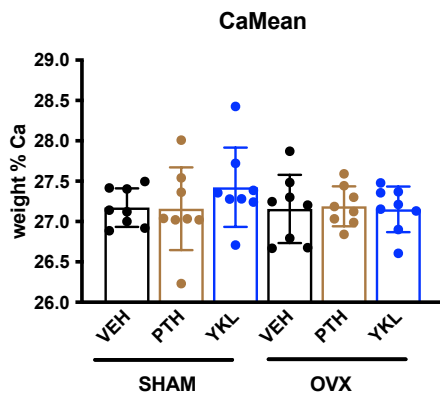**G**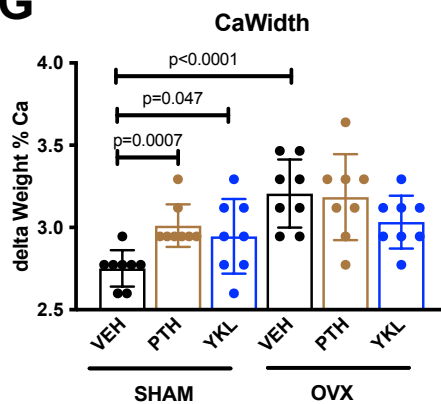**H**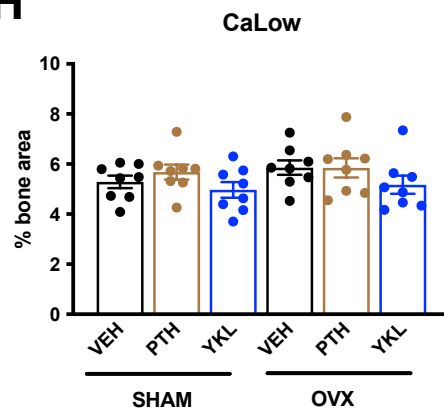

**Figure 1-figure supplement 1**

Supplement: supp [file elife-67772-supp-v1.zip › elife_poa_e67772_Figure_1_figure_supplement_1.pdf]

**A****Kidney****Liver**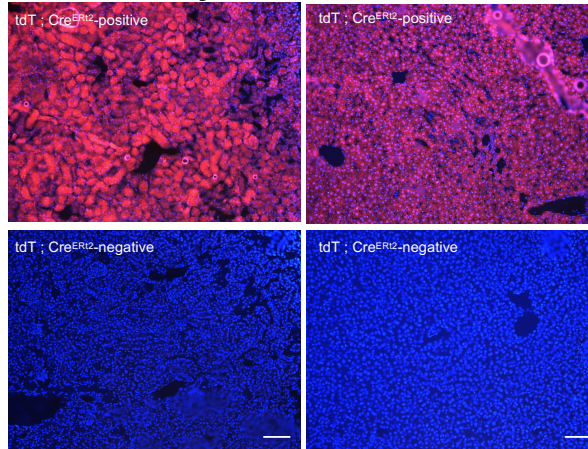**B**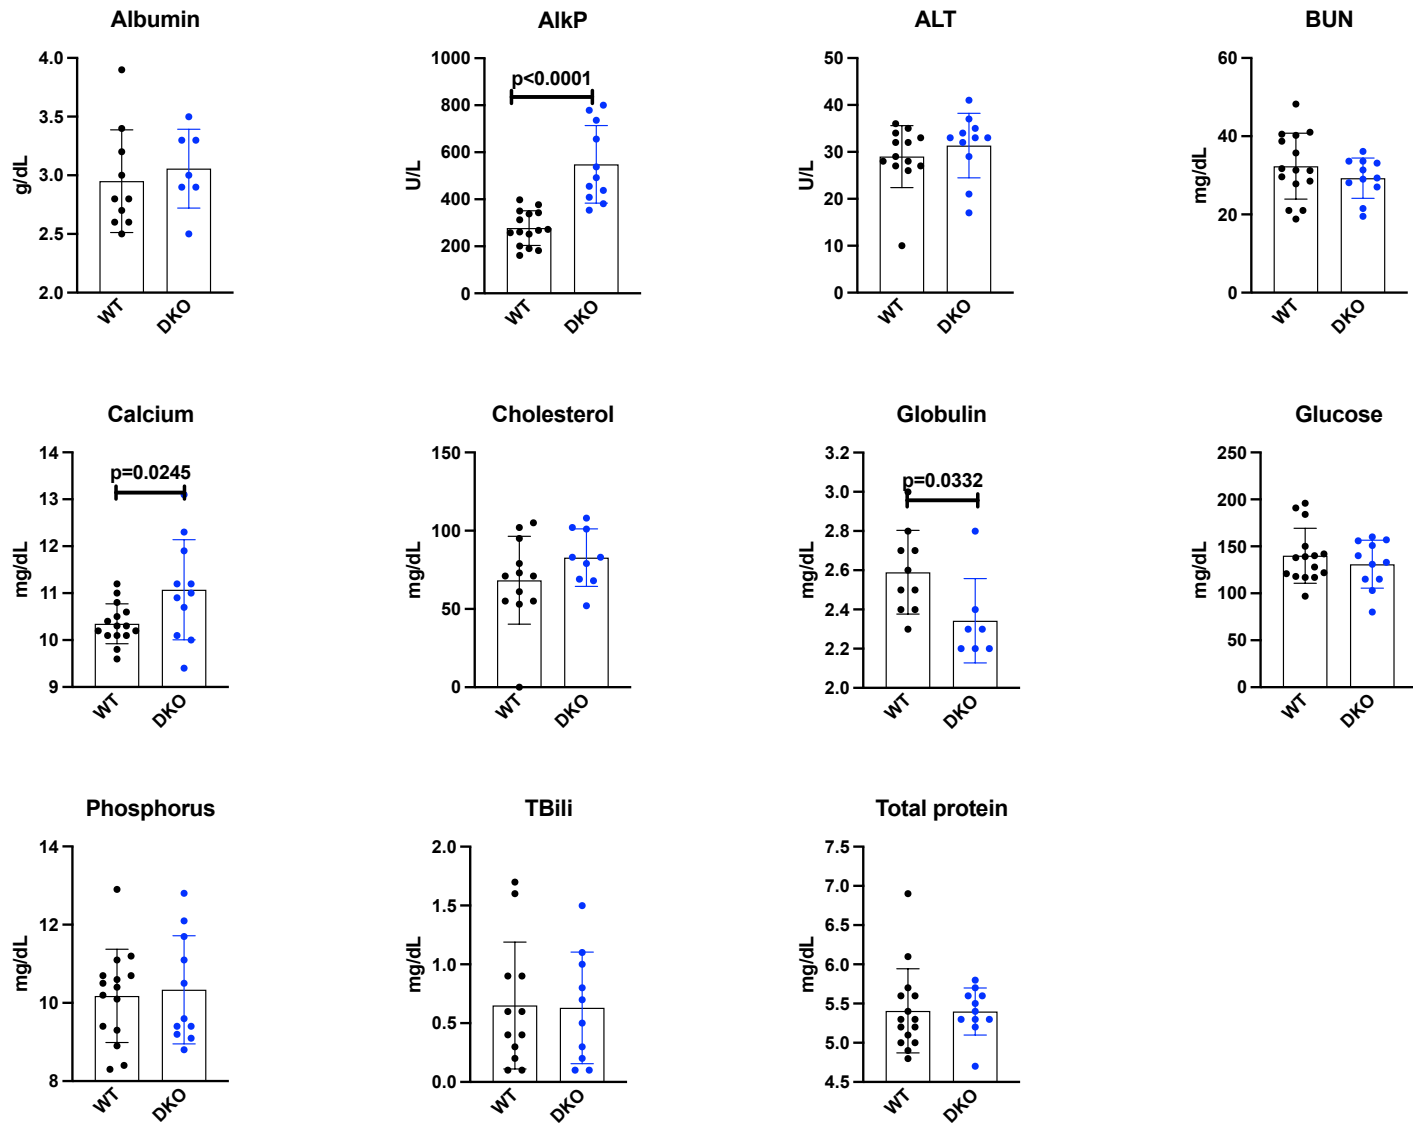**Figure 3-figure supplement 1**

Supplement: supp [file elife-67772-supp-v1.zip › elife_poa_e67772_Figure_3_figure_supplement_1.pdf]

**control**

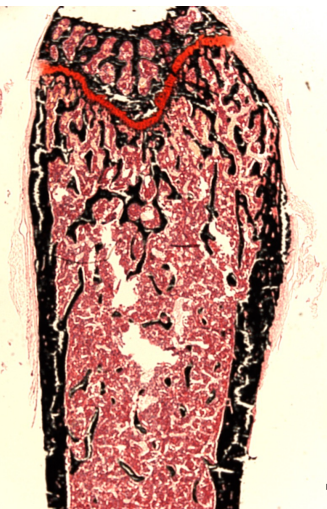

1 mm

**DKO**

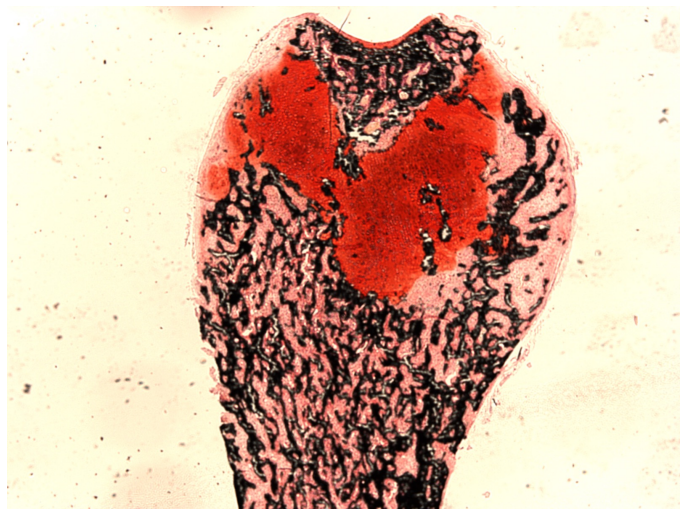

**Figure 3-figure supplement 2**

Supplement: supp [file elife-67772-supp-v1.zip › elife_poa_e67772_Figure_3_figure_supplement_2.pdf]

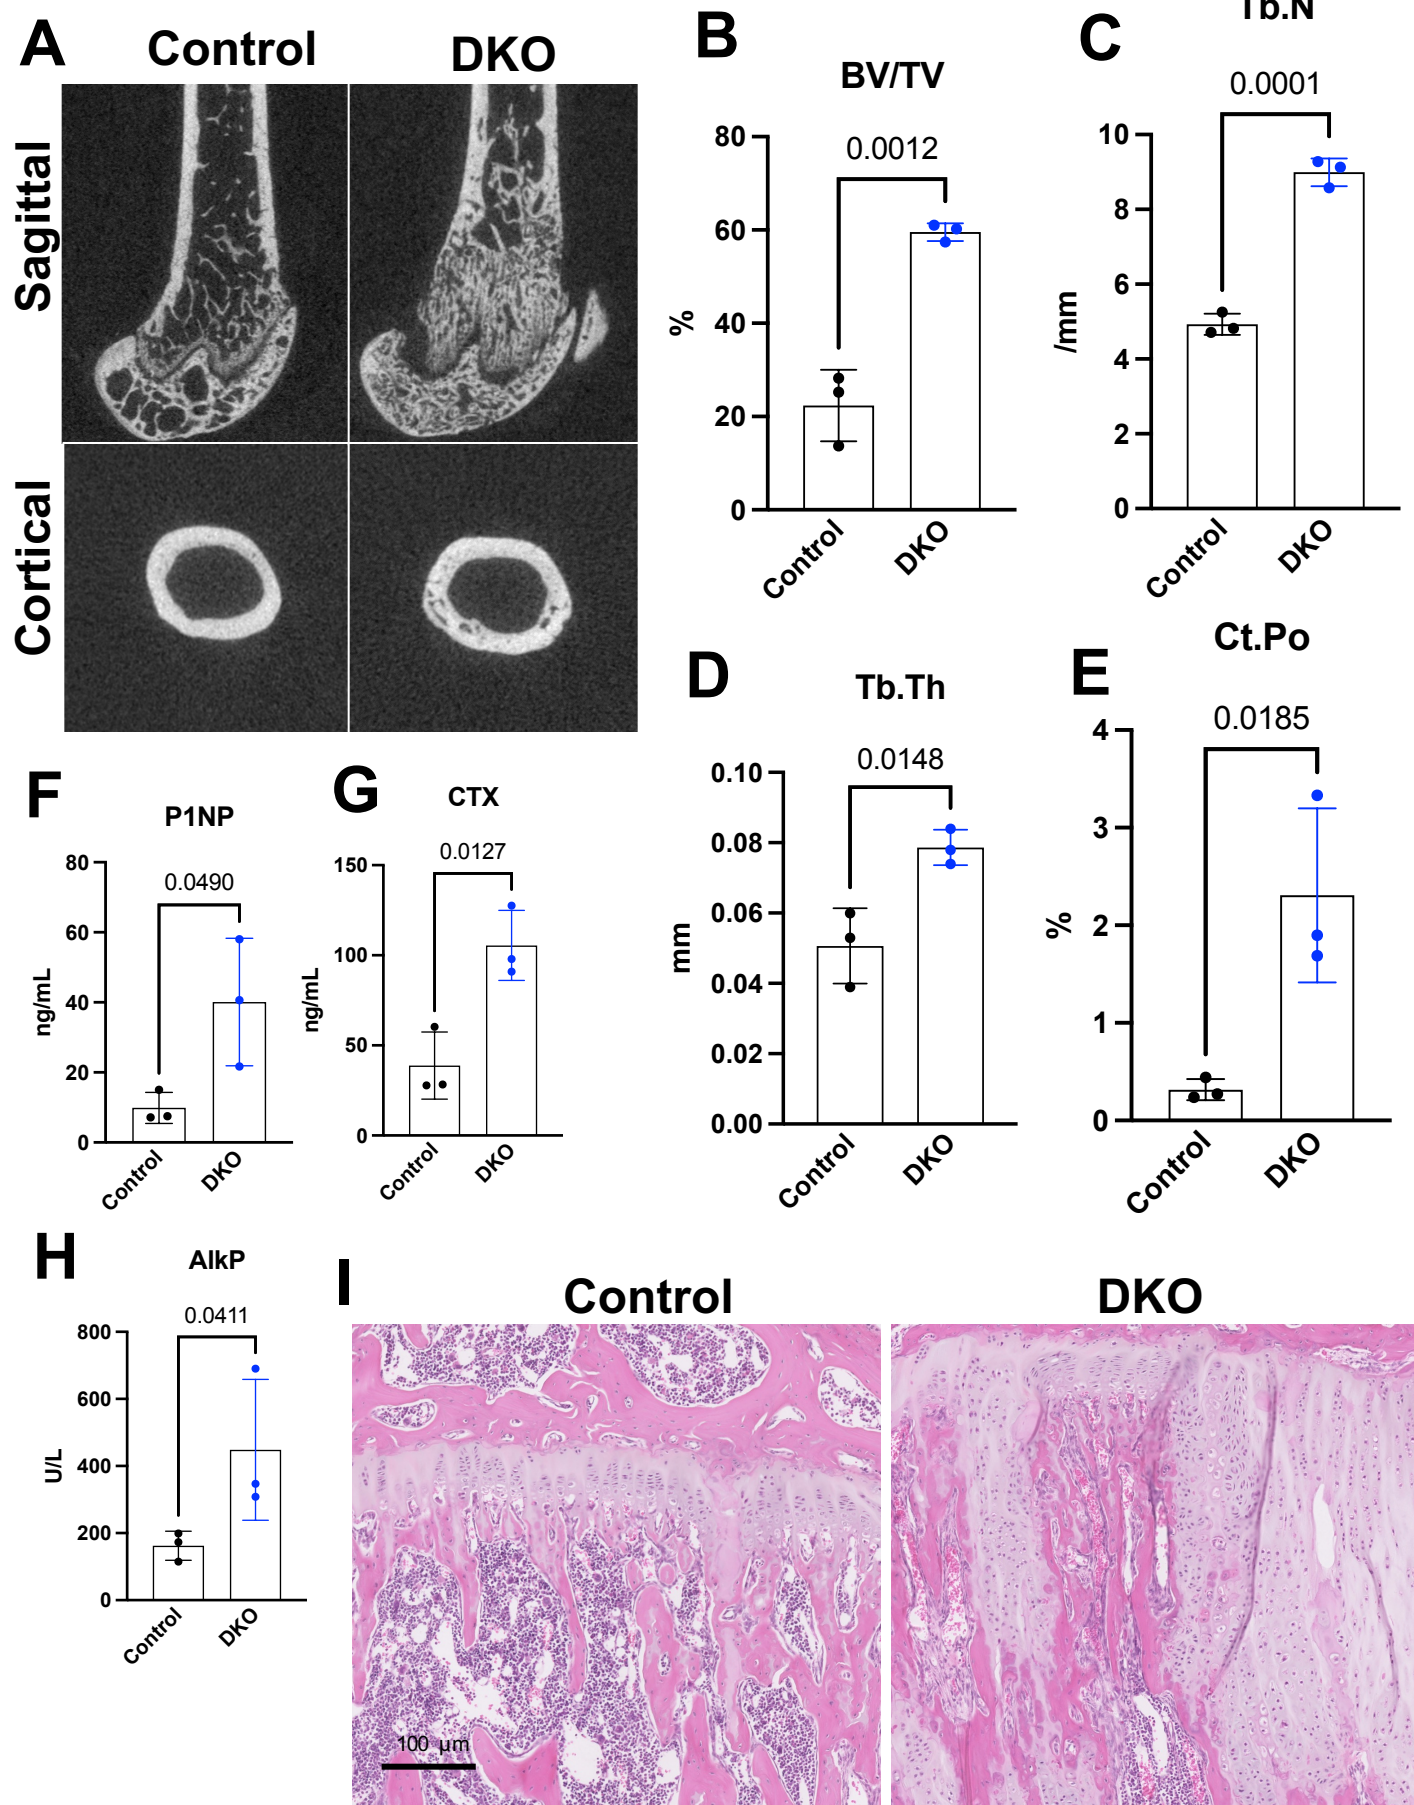

**Figure 3-figure supplement 3**

Supplement: supp [file elife-67772-supp-v1.zip › elife_poa_e67772_Figure_3_figure_supplement_3.pdf]

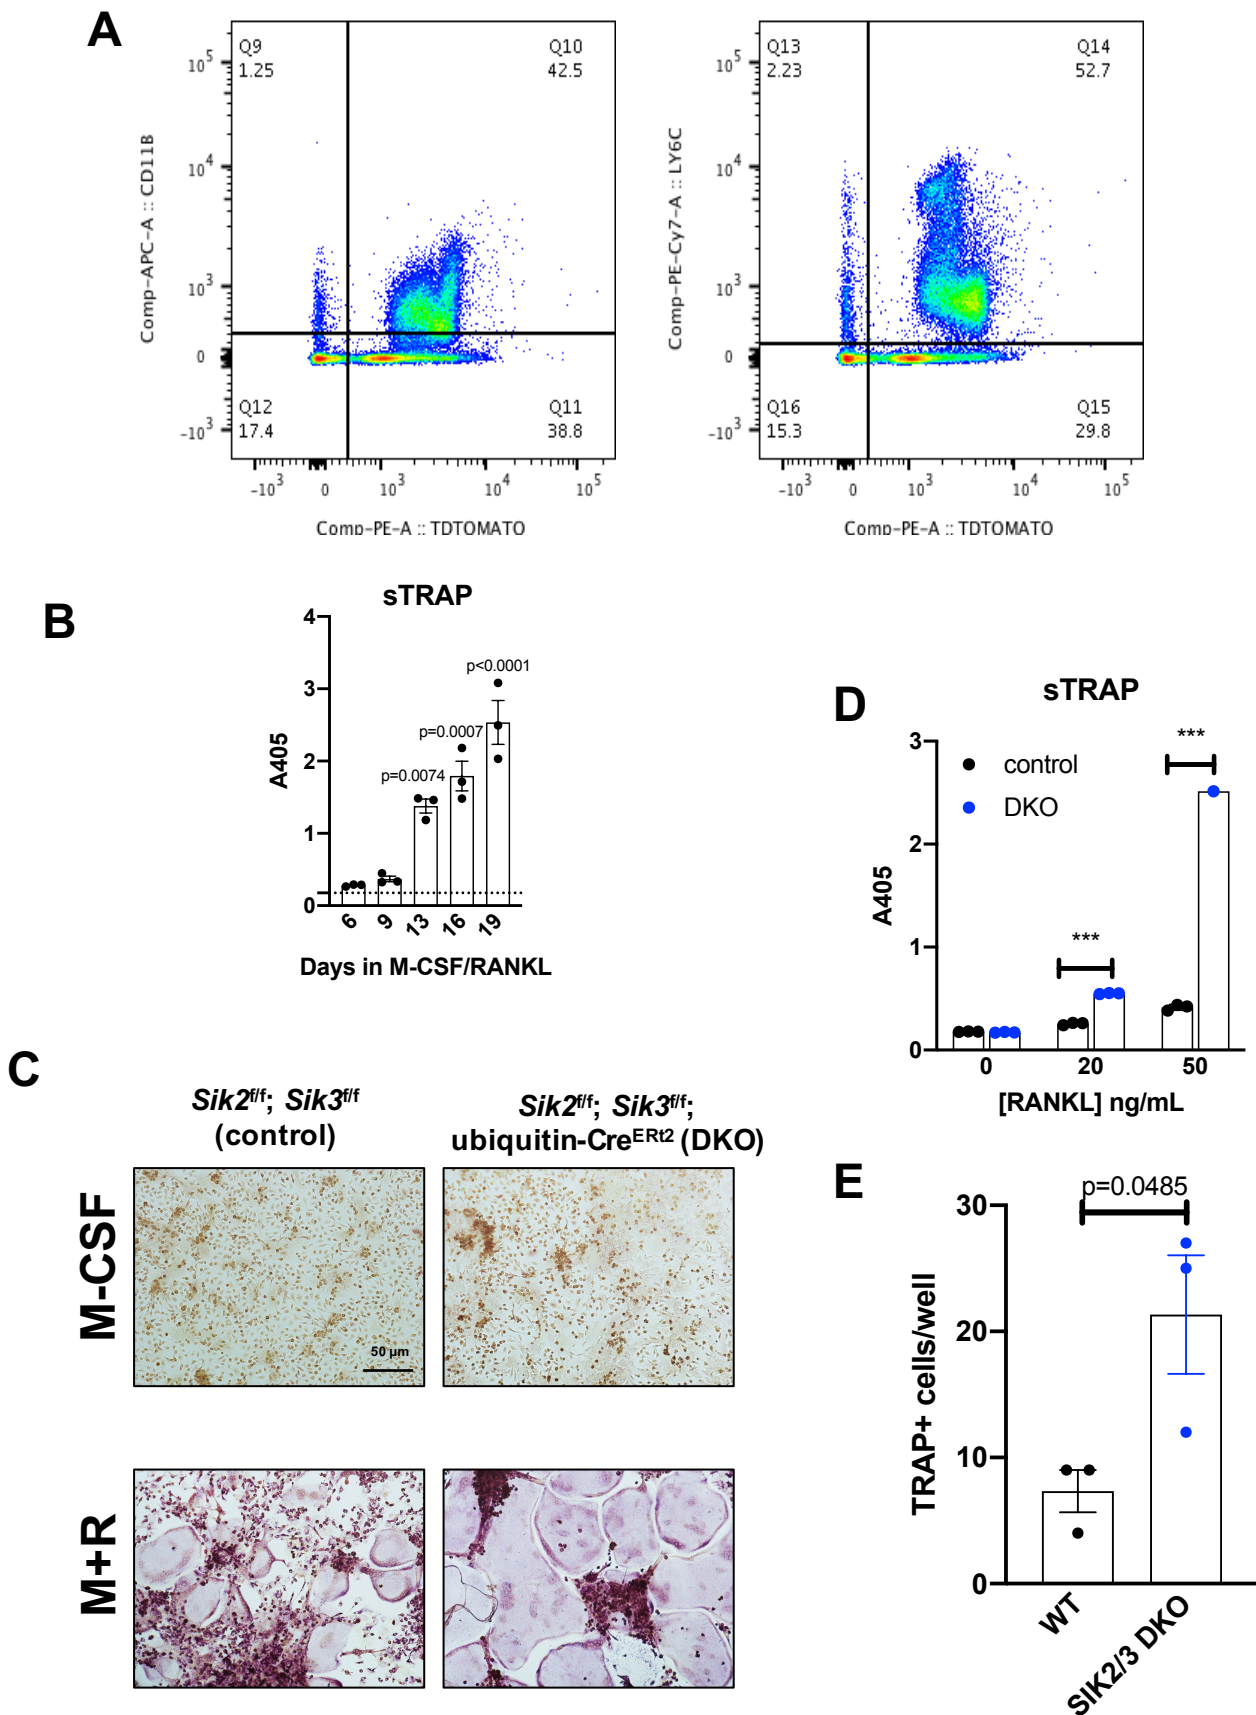

Figure 3-figure supplement 4

Supplement: supp [file elife-67772-supp-v1.zip › elife_poa_e67772_Figure_3_figure_supplement_4.pdf]

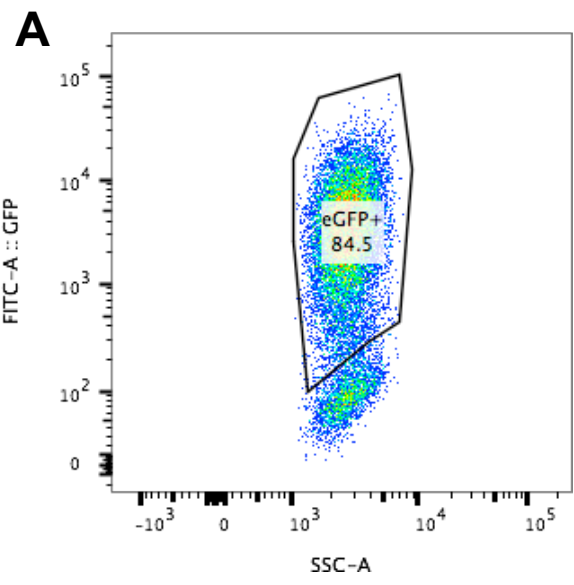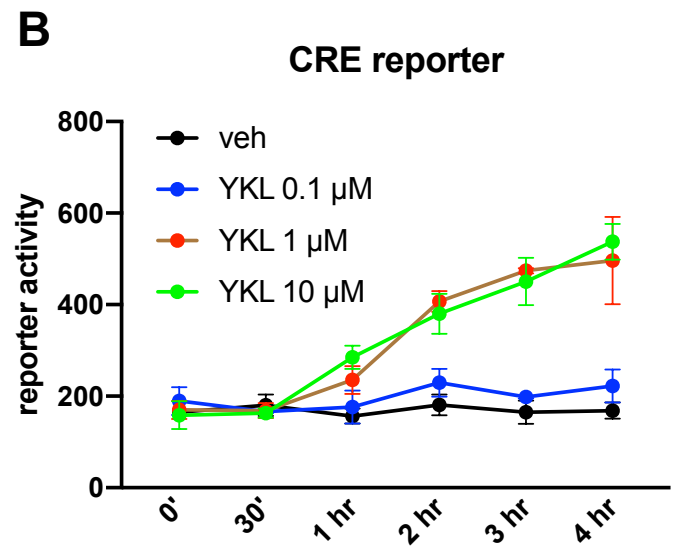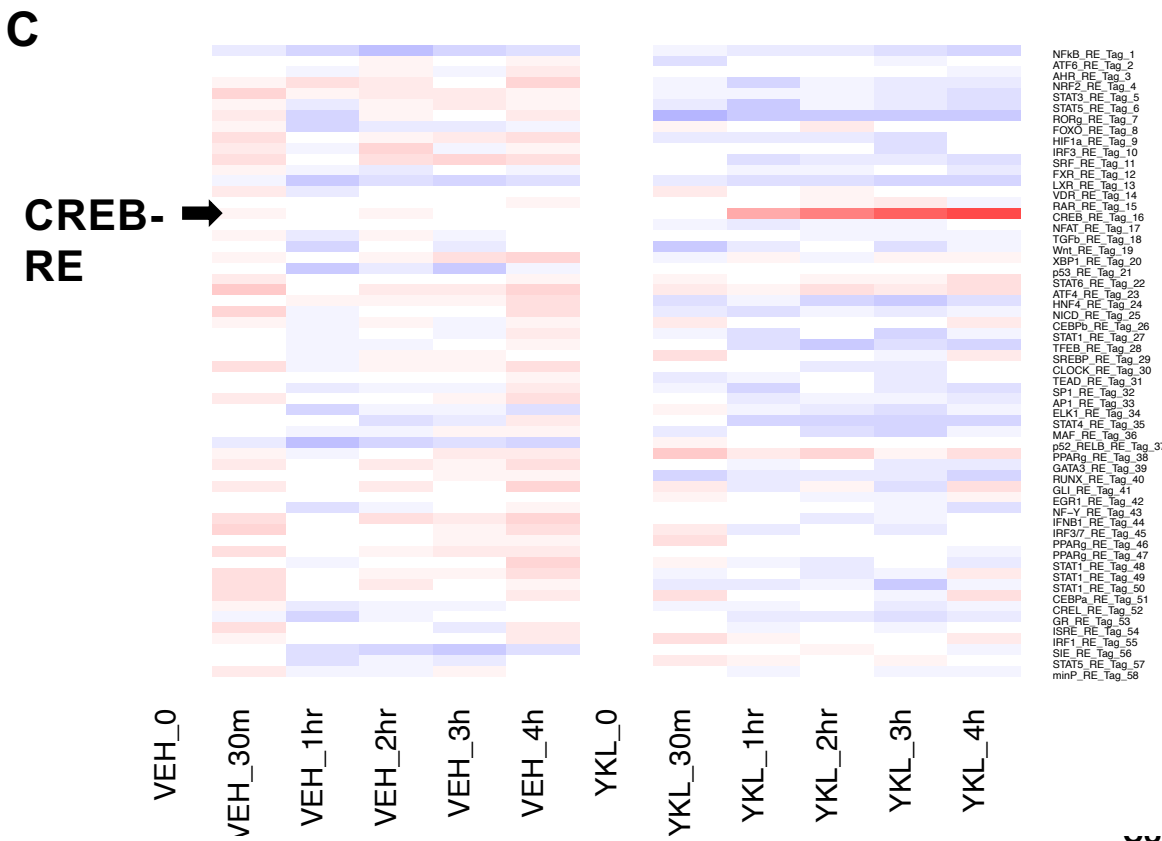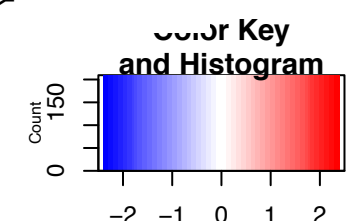

**Figure 6-figure supplement 1**

Supplement: supp [file elife-67772-supp-v1.zip › elife_poa_e67772_Figure_6_figure_supplement_1.pdf]

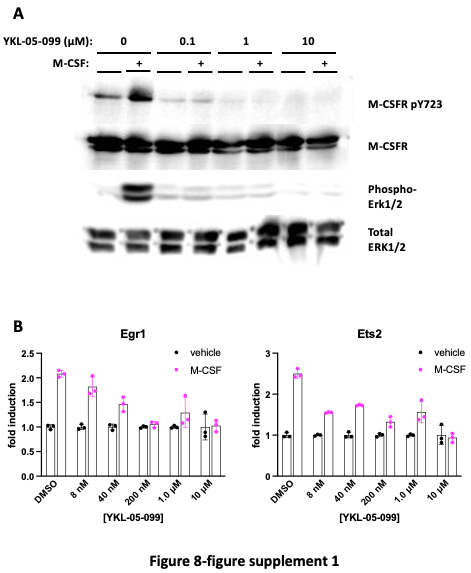

Supplement: supp [file elife-67772-supp-v1.zip › elife_poa_e67772_Figure_8_figure_supplement_1.png]

**[PLX-5622]: Control      1.22 nM      4.88 nM      19.53 nM**

**Control**

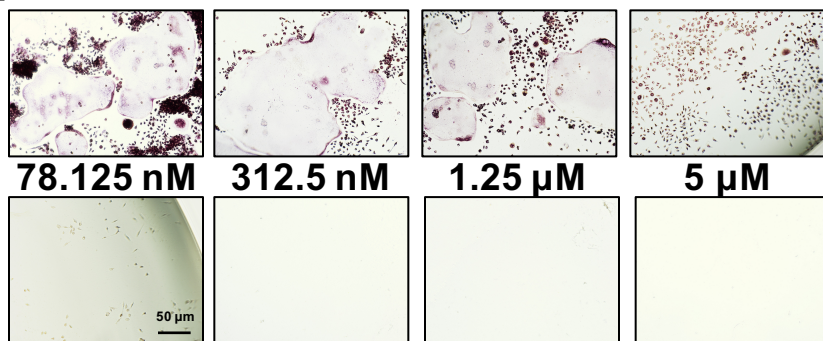

**DKO**

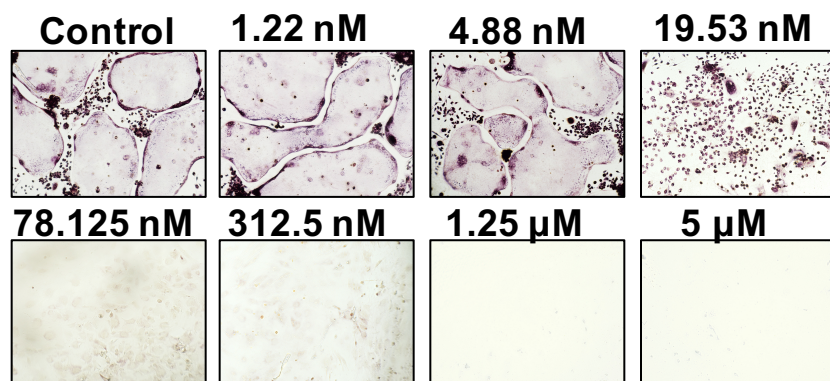

**TKO**

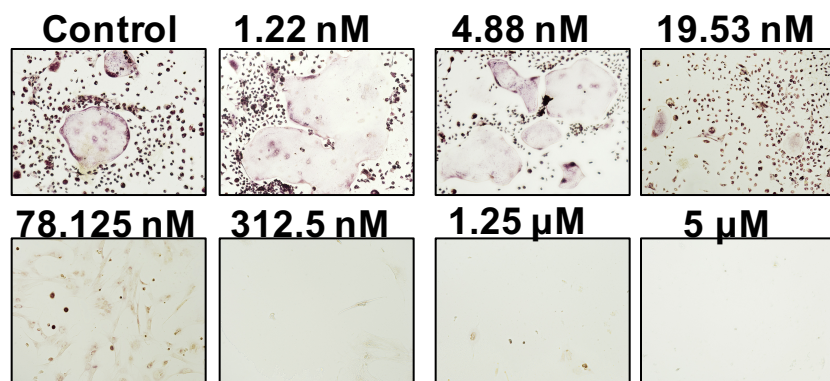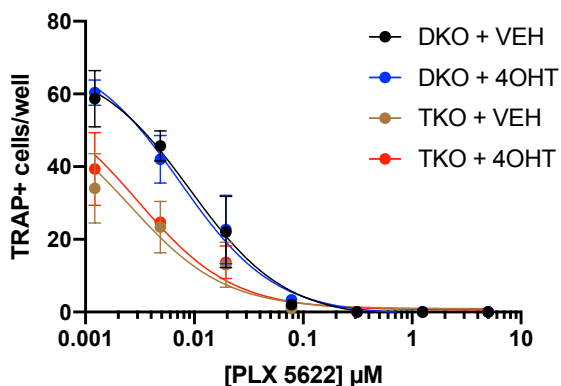

**Figure 8-figure supplement2**

Supplement: supp [file elife-67772-supp-v1.zip › elife_poa_e67772_Figure_8_figure_supplement_2.pdf]

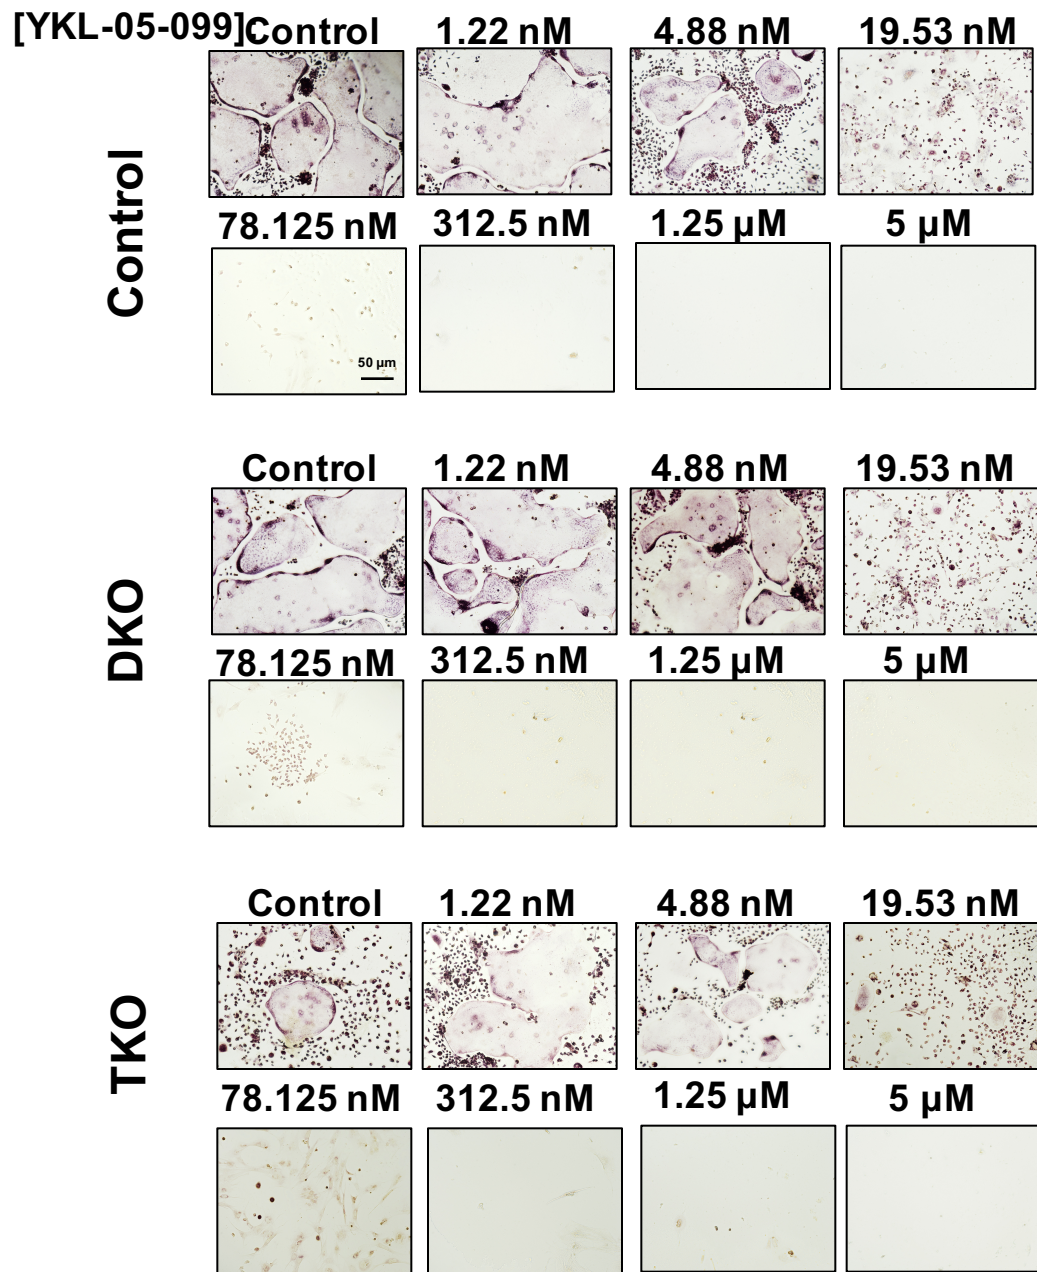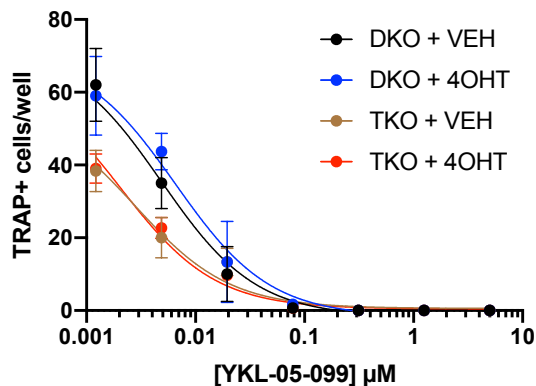

**Figure 8-figure supplement 3**

Supplement: supp [file elife-67772-supp-v1.zip › elife_poa_e67772_Figure_8_figure_supplement_3.pdf]
